1 **Structural neural connectivity analysis in zebrafish with restricted anterograde**  
2 **transneuronal viral labeling and quantitative brain mapping**

3 Manxiu Ma<sup>1,2,#</sup>, Stanislav Kler<sup>1,2,#</sup>, and Y. Albert Pan<sup>1,2,3\*</sup>

4

5 <sup>1</sup>Center for Neurobiology Research, Fralin Biomedical Research Institute at VTC, Virginia Tech,  
6 Roanoke, VA.

7 <sup>2</sup>Department of Neuroscience and Regenerative Medicine, Medical College of Georgia, Augusta  
8 University, Augusta, GA.

9 <sup>3</sup>Department of Biomedical Sciences and Pathobiology, Virginia-Maryland College of Veterinary  
10 Medicine, Virginia Tech, Blacksburg, VA.

11 #Equal contributions.

12 \*Correspondence should be addressed to Y. Albert Pan [yapan@vtc.vt.edu](mailto:yapan@vtc.vt.edu)

13 **Conflict of Interest**

14 The authors declare no conflict of interest.

15 **Acknowledgments**

16 This work was supported by funding from the National Institutes of Health (R01 EY024844 to  
17 Y.A.P.), Augusta University, and Virginia Tech. We thank the animal care staff at Augusta University

18 and Virginia Tech for animal husbandry, Owen Randlett for help with Z-Brain analysis, Didem Gotz  
19 Ayturk, Xiang Ma, and Constance Cepko for reagents and technical expertise for virus preparation,  
20 and members of the Pan lab for helpful suggestions on the manuscript.

## 21 **Abstract**

22           The unique combination of small size, translucency, and powerful genetic tools makes  
23 larval zebrafish a uniquely useful vertebrate system to investigate normal and pathological brain  
24 structure and function. While functional connectivity can now be assessed (via fluorescent  
25 calcium or voltage reporters) at the whole-brain scale, it remains challenging to systematically  
26 determine structural connections and identify connectivity changes during development or  
27 disease. To address this, we developed Tracer with Restricted Anterograde Spread (TRAS), a novel  
28 vesicular stomatitis virus (VSV)-based neural circuit labeling approach. TRAS makes use of  
29 replication-incompetent VSV (VSV $\Delta$ G) and a helper virus (lentivirus) to enable anterograde  
30 transneuronal spread between efferent axons and their direct postsynaptic targets but restricts  
31 further spread to downstream areas. We integrated TRAS with the Z-Brain zebrafish 3D atlas for  
32 quantitative connectivity analysis and identified targets of the retinal and habenular efferent  
33 projections, in patterns consistent with previous reports. We compared retinofugal connectivity  
34 patterns between wild-type and *down syndrome cell adhesion molecule-like 1 (dscaml1)* mutant  
35 zebrafish and revealed differences in topographical distribution and potential changes in the  
36 retinofugal targeting of excitatory versus inhibitory retinorecipient cells. These results  
37 demonstrate the utility of TRAS for quantitative structural connectivity analysis that would be  
38 valuable for detecting novel efferent targets and mapping connectivity changes underlying  
39 neurological or behavioral deficits.

## 40 Introduction

41 The function of the brain is closely linked to its structure, how its billions of constituent  
42 cells are wired and connected by trillions of synapses. Understanding how these connections are  
43 formed and maintained is key to gaining mechanistic insight towards brain function and  
44 identifying the causes and treatments for neuropsychiatric disorders (Belmonte et al., 2004; Lynall  
45 et al., 2010; Fornito et al., 2015). Techniques for mapping the structure and function of the brain  
46 have progressed rapidly in past decades, from anatomical structural analysis to functional  
47 computation, and from human participants to animal models (Kasthuri et al., 2015; Glasser et al.,  
48 2016). However, the large number of neurons and vast spatial scale of neuronal structures (from  
49 meters to nanometers) of the mammalian brain makes mapping neuronal networks at the cellular  
50 level and correlating them with development and disease a daunting task (Swanson and Lichtman,  
51 2016).

52 Zebrafish (*Danio rerio*), a small tropical fish, has emerged as an accessible model for  
53 studying behavior, neuronal networks, and cellular connectivity (Orger and de Polavieja, 2017).  
54 Zebrafish has analogous neuroanatomy and neurochemistry to mammals and can perform  
55 complex sensory, motor, and cognitive functions early during larval stages (5-10 days post  
56 fertilization, dpf). Importantly, at this stage, there are only roughly 100,000 neurons in the brain,  
57 80% of which can be imaged and physiologically recorded in live, behaving animals (Ahrens et al.,  
58 2013; Chen et al., 2018; Abdelfattah et al., 2019). As a result, zebrafish whole-brain functional  
59 imaging studies have been able to generate cellular resolution neuronal activity maps under

60 different behavioral contexts and linking activity maps to disease states such as autism spectrum  
61 disorder and epilepsy (Sakai et al., 2018; Thyme et al., 2019). The ability to fully interpret patterns  
62 of functional connectivity and determine causality for disorders, however, is limited by the lack  
63 of detailed structural information on neuronal wiring in zebrafish, which still lags behind other  
64 commonly used model organisms like mice, *Drosophila*, and *C. elegans*. Efforts are ongoing to  
65 map the full complement of neuronal connections (i.e., connectome) with electron microscopy  
66 in the larval and adult zebrafish, but the time and labor-intensive nature of synapse-level  
67 reconstruction has thus far restricted investigations to connections within smaller brain regions  
68 (Wanner et al., 2016; Hildebrand et al., 2017; Vishwanathan et al., 2017; Svava et al., 2018).

69 To address this, we sought to develop a virus and light imaging-based structural mapping  
70 technique that would allow for quantitative brain-wide mapping of neuronal connectivity in larval  
71 zebrafish. Previously, we found that recombinant vesicular stomatitis virus (VSV) can function as  
72 an anterograde transsynaptic tracer in a wide range of organisms (Mundell et al., 2015). VSV is a  
73 negative-strand RNA virus in the *Rhabdoviridae* family, which also includes the rabies virus (RABV).  
74 In contrast to RABV, which spreads retrogradely (from dendrite to presynaptic afferent axons),  
75 VSV spreads anterogradely (from efferent axons to their postsynaptic targets) when enveloped  
76 by its endogenous glycoprotein (VSV-G) (Beier et al., 2011b; Mundell et al., 2015). VSV injection  
77 into the retina of mice, chicken, and larval zebrafish lead to highly efficient labeling of the optic  
78 nerve and targets of the visual pathway, including both direct retinorecipient connections and  
79 areas further downstream. These findings open the door for utilizing VSV for zebrafish structural  
80 circuit mapping. Substantial limitations, however, still remain. First, the spread of VSV is

81 unrestricted, making it difficult to disambiguate direct (monosynaptic) and indirect (polysynaptic)  
82 connections. Second, replication-competent VSV and VSV-G expression are cytotoxic and lead to  
83 rapid deterioration of health in larval zebrafish (Hoffmann et al., 2010; Mundell et al., 2015).  
84 Finally, there is no established method for quantifying and annotating viral labeling in zebrafish,  
85 which is necessary to correlate anatomical tracing with functional imaging.

86 In this study, we developed a novel approach utilizing replication-incompetent VSV to  
87 achieve restricted anterograde transneuronal spread in zebrafish. We also developed an imaging  
88 and processing pipeline to register 3D image stacks to the widely used and extensively annotated  
89 Z-Brain digital atlas (Randlett et al., 2015). This method, termed TRAS (Tracer with Restricted  
90 Anterograde Spread), allows for a quantitative description of efferent connectivity based on  
91 neurotransmitter types and specific locations. We applied TRAS to investigate the axon projection  
92 patterns of retinorecipient cells and identified potential connectivity changes in zebrafish carrying  
93 a mutation in *down syndrome cell adhesion molecule-like 1 (dscaml1)*, a causal gene for autism  
94 spectrum disorder and human cortical abnormalities (Fuerst et al., 2009; Iossifov et al., 2014;  
95 Karaca et al., 2015; Galicia et al., 2018; Ma et al., 2019).

96

## 97 **Materials and Methods**

### 98 **Zebrafish husbandry**

99 Zebrafish (all ages) were raised under a 14/10 light/dark cycle at 28.5°C. Embryos and  
100 larvae were raised in water containing 0.1% Methylene Blue hydrate (Sigma-Aldrich). With the

101 exception of *nacre* mutants, embryos were transferred to E3 buffer containing 0.003% 1-phenyl-  
102 2-thiourea (PTU; Sigma-Aldrich) to prevent pigment formation at 24 hours post-fertilization.  
103 Developmental stages are as described by Kimmel et al. (Kimmel et al., 1995). Sex was not  
104 considered as a relevant variable for this study, as laboratory zebrafish remain sexually  
105 undifferentiated until two weeks of age, beyond the stages being used (0-9 dpf) (Maack and  
106 Segner, 2003; Wilson et al., 2014). All experimental procedures are performed in accordance with  
107 Institutional Animal Care and Use Committee guidelines at Augusta University and Virginia Tech.

### 108 **Transgenic and mutant zebrafish lines**

109 The *dscam1<sup>vt1</sup>* mutant line was generated by TALEN-targeted mutagenesis, which resulted  
110 in a seven base pair deletion and subsequent early translational termination (Ma et al., 2019).  
111 The *Tg(elavl3:H2B-GCaMP6f)* line was generously provided by E. Aksay at Weill Medical College,  
112 with permission from M. Ahrens at HHMI Janelia Farm Research Campus (Kawashima et al., 2016).  
113 The *vglut2a:GFP* line [*Tg(slc17a6b:EGFP)*] was generously provided by J. Fetcho at Cornell  
114 University with permission from S. Higashijima at the National Institute for Basic Biology (Bae et  
115 al., 2009).

### 116 **Preparation of VSVΔG**

117 VSV was prepared using methods detailed by Beier et al. 2016 (Beier et al., 2016). 293T  
118 cells (ATCC, #CRL-3216) were transfected at 80% confluency on 75 cm<sup>2</sup> flasks with 7 μg of *pCI-*  
119 *VSVG* plasmid (Addgene, #1733) and incubated overnight at 37°C. Afterward, cells were infected  
120 with VSVΔG-RFP (VSVΔG for short) (Beier et al., 2011b) at a multiplicity of infection (m.o.i.) of 0.1.

121 Viral supernatants were collected for the subsequent three days at 24-hour intervals and  
122 combined. Cell debris was precipitated by centrifugation at 1,000 g for 20 min. To concentrate  
123 VSV $\Delta$ G, viral supernatant was ultracentrifuged for three hours at 80,000 g with an SW32Ti rotor,  
124 and the pellet was resuspended in 100  $\mu$ l of culture medium. Viral stocks were titered by serial  
125 dilution on 90% confluent 293T cells. The number of fluorescent foci was calculated at two days  
126 post infection (dpi) by identifying RFP-positive cells. Typical viral titer was higher than  $1 \times 10^9$  focus  
127 forming units/ml (ffu/ml).

128 For *in vitro* trans-complementation of VSV $\Delta$ G with lentivirus, BHK-21 cells (ATCC, #CCL-10)  
129 were seeded into 96-well plate and incubated overnight to reach 20,000 cells per well. Cell culture  
130 was co-infected with VSV $\Delta$ G (m.o.i.=0.005) and VSV-G pseudotyped lentivirus (m.o.i.=0-10,000)  
131 (lentivirus-SIN-CMV-eGFP or lentivirus-SIN-Ubi-iCre-mCherry; GT3 Core Facility of the Salk  
132 Institute). At two hours post infection, cells were washed twice with PBS and incubated with fresh  
133 medium supplemented with 2% serum. At 2 dpi, the spread of VSV was visualized by fluorescent  
134 microscopy. The media in each well were collected and titered to evaluate viral yield.

### 135 **Virus injection**

136 Viral injections were performed as previously described (Mundell et al., 2015; Beier et al.,  
137 2016). Briefly, glass capillaries (TW100F-4; World Precision Instruments) were pulled into  
138 injection needles with a pipette puller (P-97; Sutter Instruments). The tips of injection needles  
139 were trimmed to create a  $\sim 10$   $\mu$ m opening. Virus injection solution was made by diluting VSV $\Delta$ G  
140 and lentivirus stock with tissue culture medium (DMEM; Fisher Scientific), with Fast Green dye



141 (BP123-10; Fisher Scientific) as the injection marker. 2  $\mu$ l of injection solution was loaded into the  
142 injection needle with a Microloader pipette tip (930001007; Eppendorf), and mounted into a  
143 microelectrode holder connected to a pneumatic PicoPump (PV820; World Precision  
144 Instruments). Injection volume was determined by calibrating the volume of the injected droplet  
145 on a stage micrometer (50-753-2911; Fisher Scientific). The hold pressure of the PicoPump was  
146 adjusted so that there was a slight outflow of virus solution when the needle tip was immersed  
147 in fish water.

148 For retina injection, 2.5 or 3 dpf larvae were anesthetized in Tricaine (0.013% w/v,  
149 AC118000500; Fisher Scientific) mounted laterally inside the center chamber of a glass-bottom  
150 dish (P50G-1.5-14-F; MatTek) with 1.5% low melting-point agarose (BP1360; Fisher Scientific).  
151 After the agarose has solidified, the dish is filled with Tricaine solution (0.013%) to maintain  
152 anesthesia. Under a stereo dissecting microscope (SMZ18; Nikon), the needle tip was moved with  
153 a micromanipulator (MN-151; Narishige) to approach the fish from the rear and penetrated the  
154 temporal retina, with the needle tip being in the neural retina. 0.25-0.5 nl of virus solution  
155 (concentrations as described in the Results section) were injected inside the retina. After injection,  
156 larvae were recovered from the agarose and returned to a 28°C incubator. Overall, the  
157 combination of VSV $\Delta$ G and lentivirus (i.e., TRAS) only labeled cells in areas innervated by or  
158 adjacent to the optic nerve. It is worth noting that in one experiment we did observe neuronal  
159 cell bodies in the hindbrain and contralateral midbrain, which are two synapses downstream  
160 from RGCs (Helmbrecht et al., 2018) (1-2 cells in 50% of injected fish, n=10, Supplementary Figure  
161 S1). This may be due to VSV $\Delta$ G self complementation in the retinorecipient cells at high m.o.i.

162 For all quantitative analysis involving selective labeling for primary retinorecipient cells, we used  
163 viral titers that did not result in secondary spread (VSV $\Delta$ G at  $3 \times 10^7$  ffu/ml and lentivirus at  $3 \times 10^{10}$   
164 ffu/ml).

165 For habenula injection, 3 dpf larvae were mounted as described for retina injection, with  
166 the dorsal side up. The agarose and skin above the left habenula were carefully removed with a  
167 sharpened tungsten needle (10130-05; Fine Science Tools). The injection needle tip was inserted  
168 into the left habenula and remained there for 5 s, allowing the slow outflow of virus solution  
169 (VSV $\Delta$ G at  $3 \times 10^8$  ffu/ml, lentivirus at  $1 \times 10^{11}$  ffu/ml) to immerse the surrounding tissue. At 1 dpi,  
170 larvae with habenula-specific RFP expression were screened and later fixed at 3 dpi for  
171 immunohistochemistry and confocal imaging.

## 172 **Immunohistochemistry**

173 Whole-mount immunohistochemistry was performed as described by Randlett et al. 2015  
174 (Randlett et al., 2015). Zebrafish larvae were fixed overnight with 4% PFA and 0.25% Triton X-100  
175 (Fisher Scientific) in 1X PBS (diluted from 10%PFA; Polysciences), then washed with 1X PBS and 0.  
176 25% Triton X-100. H2B-GCaM6f was stained with FluoTag-X4 anti-GFP (N0304-At488; NanoTag);  
177 GABA was stained with Rabbit anti-GABA (A2052; Sigma-Aldrich); ERK1/2 was stained with mouse  
178 anti-ERK1/2 (4696S; Cell Signaling Technology). The sRIMS solution, which is D-Sorbitol (Sigma-  
179 Aldrich) dissolved in PBS with 0.1% Tween-20 (Fisher Scientific) and 0.01% Sodium Azide, was  
180 used for optical clearing (Yang et al., 2014). Samples are immersed for 15 min (or until sunken to  
181 the bottom of the Eppendorf tube) through a gradient series (8.75% to 70%) of D-Sorbitol.

## 182 **Image acquisition**

183 Epifluorescence images of cultured cells were acquired under a Nikon Eclipse Ts2 inverted  
184 fluorescent microscope. Images of zebrafish were acquired using a Nikon A1 laser scanning  
185 confocal system with a CFI75 Apochromat LWD 25x water-immersion objective. For TRAS  
186 quantification, image stacks were acquired at a standard resolution of  $0.49 \times 0.49 \times 2.0 \mu\text{m}^3$  per  
187 voxel. For efferent tract tracing, a standard resolution stack and a high-resolution stack ( $0.38 \times$   
188  $0.38 \times 0.5 \mu\text{m}^3$  per voxel) were acquired for each fish.

## 189 **Efferent tract tracing**

190 Standard resolution image stacks were morphed to the Z-Brain *elavl3:H2B-RFP* template  
191 using CMTK (Randlett et al., 2015). High-resolution stacks were then morphed to its  
192 corresponding low-resolution stacks to register to Z-Brain coordinates. Morphed high-resolution  
193 stacks were imported into the neuTube software for tracing, in accordance with the neuTube  
194 online manual (<https://www.neutracing.com/manual/>) (Feng et al., 2015). The SWC files were  
195 saved and imported into Fiji plugin “Simple Neurite Tracer” then saved as an overlay.

## 196 **TRAS quantitation with Z-Brain**

197 Image stacks used for cell-type characterization were morphed to the Z-Brain *elavl3:H2B-*  
198 *RFP* template using CMTK, using the GCaMP6f channel as reference (Randlett et al., 2015). After  
199 morphing, the Fiji software’s ROI manager (Analyze>Tools>ROI manager; extra-large size dot) was  
200 used on the VSV $\Delta$ G channel to mark all VSV $\Delta$ G+ cells. The marked positions (ROIs) were saved  
201 into a zip file and overlaid onto the GCaMP6f channel. The ROIs that were GCaMP6f-negative

202 were removed so that the remaining ROIs represented TRAS-labeled neurons (neuronal ROIs).  
203 Next, the neuronal ROIs were overlaid onto the GABA channel to create two subsets: the GABA+  
204 ROIs (inhibitory neurons) and GABA- ROIs (excitatory neurons, created by subtracting the  
205 neuronal ROI with the GABA+ ROIs). Lastly, these two ROIs were overlaid onto a Z-brain reference-  
206 sized (X:Y:Z=1121x496x276  $\mu\text{m}^3$  at 0.8x0.8x2  $\mu\text{m}^3$  per voxel) blank stack, with inhibitory neuron  
207 ROIs pseudocolored magenta and excitatory neuron ROIs pseudocolored green.

208 To quantitate the anatomical distribution of retinorecipient cells, we followed the  
209 procedures for Z-Brain MAP-map analysis, but with several modifications (Randlett et al., 2015).  
210 Instead of using the MakeTheMAPmap.m MATLAB script, we used a custom Fiji macro script to  
211 create an image file. The image file which was quantified using a modified  
212 ZBrainAnalysisOfMAPmaps.m script that quantify sum pixel intensity values for neuronal ROIs  
213 within each region mask. The output Intensity values were converted to cell counts, based on an  
214 estimate of the pixel values generated from a single-cell ROI (~18,265). For heatmap display and  
215 cohort-wise comparison of individual regions, the intensity signals for each fish were normalized  
216 by the total signal from “Diencephalon” and “Mesencephalon.” The numbers were then imported  
217 into MATLAB to make a scaled color map using “imagesc” function.

## 218 **Analysis of topographical distribution**

219 To analyze the topographical distribution of wild-type and *dscaml1*<sup>-/-</sup> retinorecipient cells  
220 (Fig. 5), the ROI files from all fish within a cohort were combined into a single zip file and overlaid  
221 into a Z-Brain compatible blank stack, as described previously for single fish ROI image files. ROI

222 files from individual fish from the same genotype were combined into a single zip file. The x-y-z  
223 coordinates of each ROI dot were used in “scatter3” function in MATLAB to create 3-D scatter  
224 plots. The same coordinates were imported into GraphPad for analysis of distribution properties.  
225 The cumulative frequency statistics were done using the K-S test provided within the Prism  
226 software (GraphPad).

## 227 **Excitatory/Inhibitory ratio**

228 The total number of neurons in the *dscaml1*<sup>-/-</sup> cohort (267) was normalized to the total  
229 number of wild-type neurons (340), and the normalized increase of 27.34% in mutants was  
230 proportionally applied to individual anatomical regions and rounded up to a whole number.  
231 Excitatory-to-inhibitory neuron number ratios were calculated based on the estimated number  
232 of neurons within each anatomical region. In order to obtain valid ratio values, only regions with  
233 non-zero values were used for ratio analysis.

234

## 235 **Results**

### 236 **Trans-complementation of VSV $\Delta$ G by VSV-G coated lentivirus**

237 For both VSV and RABV, the envelope glycoprotein (G) gene is essential for binding,  
238 internalization, membrane fusion, and release of the viral genome into the host cell (Albertini et  
239 al., 2012; Kim et al., 2017). A recombinant virus with genomic deletion of the G gene ( $\Delta$ G) can  
240 infect and replicate inside the cell but is unable to spread, unless the host cell complements the

241 virus by providing G *in trans* (Wickersham et al., 2007; Beier et al., 2011b). Trans-  
242 complementation can, therefore, be utilized to restrict viral spread to direct synaptic partners.  
243 For instance, expressing the RABV-derived glycoprotein (RABV-G) in neurons at the injection site  
244 (starter cells) allowed VSV $\Delta$ G or RABV $\Delta$ G to spread from the starter cells to their input neurons.  
245 Once inside the input neurons, the virus can no longer spread (Wickersham et al., 2007; Beier et  
246 al., 2013).

247         Given VSV's ability to spread anterogradely across synapses, we asked whether trans-  
248 complementing VSV $\Delta$ G virus with VSV glycoprotein (VSV-G) could enable restricted anterograde  
249 spread (Mundell et al., 2015). Our efforts to express VSV-G *in vivo* through transgenesis was  
250 unsuccessful, possibly due to the pathogenic effects of VSV-G when persistently expressed (Yee  
251 et al., 1994). As an alternative, we tested whether VSV-G protein could be transduced to cells  
252 directly. We took advantage of the fact that most commercially available lentiviruses are coated  
253 with VSV-G and examined *in vitro* whether concomitant VSV $\Delta$ G/lentivirus infection could provide  
254 sufficient VSV-G to trans-complement VSV $\Delta$ G. 293T cells were co-infected with VSV-G enveloped,  
255 RFP-expressing VSV $\Delta$ G at low density [multiplicity of infection (m.o.i.) = 0.005] and lentivirus at a  
256 range of densities (m.o.i. = 0 to 1,000). At two days post-infection (dpi), we visualized the spread  
257 of VSV $\Delta$ G by fluorescent microscopy and determined the yield of newly synthesized VSV $\Delta$ G in the  
258 media. Indeed, lentivirus complemented VSV $\Delta$ G in a dose-dependent manner, indicating that  
259 VSV-G on the envelope of lentivirus could be taken up by VSV $\Delta$ G to form functional virions (Fig.  
260 1A-C).

261           Lentivirus-mediated trans-complementation was also effective *in vivo*, enabling  
262 transneuronal spread. By itself, VSV $\Delta$ G injection (0.5 nl at  $10^8$  ffu/ml) into the eye resulted in  
263 retina infection and RFP labeling of the optic nerve, but no cellular labeling in the brain (Fig. 1D-  
264 E). This suggested that VSV $\Delta$ G was not released from axon terminals to initiate a new cycle of  
265 infection in the brain. When low ( $5 \times 10^9$  ffu) or high titer lentivirus ( $2 \times 10^{10}$  ffu) was co-injected  
266 with VSV $\Delta$ G ( $10^8$  ffu/ml), we observed cellular labeling in the brain in both conditions, with more  
267 spread in injections with high titer lentivirus (Fig. 1F-G). This agrees with our *in vitro* results and  
268 indicates that high titer lentivirus can trans-complement VSV $\Delta$ G, allowing viral spread from axon  
269 terminals.

270           The ability of lentivirus to trans-complement was not dependent on what the lentivirus  
271 genome encodes. Two types of VSV-G coated lentivirus were tested (lentivirus-SIN-CMV-eGFP  
272 and lentivirus-SIN-Ubi-iCre-mCherry). Both were able to mediate trans-complementation, and  
273 neither were able to drive transgene expression (eGFP and iCre-mCherry, respectively) on their  
274 own in fish at 6 dpi. Lastly, we asked whether VSV $\Delta$ G could self-complement at higher titer since  
275 VSV $\Delta$ G itself was also enveloped in VSV-G. Indeed, high titer VSV $\Delta$ G ( $2 \times 10^9$  ffu/ml) could spread  
276 from the RGC to retinorecipient cells in the brain (Fig. 1H). Together, these results show that VSV-  
277 G from different viral particles could be recycled to form infectious VSV particles.

### 278 **Restricted anterograde spread of VSV $\Delta$ G in the zebrafish visual pathway**

279           Since lentivirus was supplied at the injected site, only neurons at the injection site (starter  
280 cells) should be able to mediate spread. The spread from the starter cells should be limited to

281 direct postsynaptic targets, i.e., anterograde monosynaptic spread. To test this, we examined  
282 whether the spatial and temporal patterns of VSV $\Delta$ G spread were consistent with monosynaptic  
283 spread from retinal ganglion cells (RGCs) to retinorecipient neurons in the brain.

284 VSV $\Delta$ G and lentivirus were coinjected into anesthetized 3 dpf zebrafish larvae, followed  
285 by live confocal imaging at different time points (n=8 animals). Initial RFP expression from VSV $\Delta$ G  
286 was present in the injected (left) eye as early as 5-hours post infection (hpi) (Fig. 1I). Cellular  
287 labeling in the contralateral (right) brain was observed at 1 dpi, and more cells were labeled at 3  
288 dpi (Fig. 1J-K). At 6 dpi, there was no further spread to other brain regions, compared to 3 dpi (Fig.  
289 1L). This pattern of labeling is distinct from non-G-deleted (replication competent) VSV, which  
290 rapidly progressed from axonal labeling to cell body labeling in downstream areas like the  
291 cerebellum and habenula at 3 dpi (Mundell et al., 2015). These results suggest that lentivirus  
292 trans-complementation primarily mediated anterograde monosynaptic spread. We call this new  
293 technique Tracer with Restricted Anterograde Spread (TRAS, pronounced like *trace*).

#### 294 **Efferent projections of retinorecipient cells were revealed by TRAS**

295 Retinorecipient cells extend axons to different parts of the brain to mediate visually guided  
296 cognitive, sensory, motor, and homeostatic functions. Previous studies have utilized transgenic  
297 reporter lines to characterize efferent projections of subsets of retinorecipient cells, but there has  
298 not been a method that could unbiasedly label retinorecipient cells in different brain regions and  
299 reveal their efferent projections (Zhang et al., 2017; Helmbrecht et al., 2018; Kramer et al., 2019).  
300 With TRAS, we observed several prominent efferent tracts from retinorecipient neurons,



301 innervating the telencephalon (6 of 8 animals), habenula (2 of 8), midbrain tegmentum (7 of 8),  
302 contralateral optic tectum (7 of 8), cerebellum (6 of 8), and along the ventral hindbrain (6 of 8)  
303 (Fig. 2, image stack for panel 2A is shown in supplementary video 1). These projection patterns  
304 are reminiscent of the efferent projections of tectal/pretectal retinorecipient neurons, further  
305 supporting the idea that TRAS primarily labels retinorecipient cells (Sato et al., 2007; Mundell et  
306 al., 2015; Helmbrecht et al., 2018; Kramer et al., 2019). The projection into the telencephalon by  
307 retinorecipient neurons, to our best knowledge, has not been reported previously. These axon  
308 projections extend rostrally to enter the subpallium and then courses dorsally to the caudal  
309 pallium. Some axons crossed near the anterior commissure. These pallium-projecting neurons  
310 may serve similar roles as the mammalian lateral geniculate neurons to relay sensory information  
311 to higher visual areas (Mueller, 2012). These results show that TRAS could be used to identify not  
312 only postsynaptic cells but also downstream areas innervated by these cells.

### 313 **3D mapping and cell-type characterization**

314 To quantify connectivity patterns, we registered TRAS-labelled image stacks to the Z-Brain  
315 zebrafish brain atlas (Randlett et al., 2015). Transgenic fish expressing neuronal-localized nuclear  
316 GCaMP6f (*elavl3:H2B-GCaMP6f*) were injected at 2.5 dpf, into the temporal region of the left eye  
317 (representing the frontal visual field). Infected larvae were fixed at 3 dpi and stained with anti-  
318 GFP (to amplify the GCaMP6f signal) and anti-GABA. Stained samples were then cleared in sRIMS,  
319 a sorbitol-based mounting media that was crucial to resolving single cells and axon tracts in the  
320 ventral brain (Yang et al., 2014) (Fig. 3A-B, Supplementary Figure S2). By extracting the Z-Brain  
321 *elavl3:H2B-RFP* stack from ZBrainViewer as the reference, image stacks were morphed and

322 aligned with the Computational Morphometry Toolkit (CMTK) (Rohlfing and Maurer, 2003; Jefferis  
323 et al., 2007; Randlett et al., 2015).

324 To distinguish between different cell types, both transgenic and immunohistochemical  
325 markers were used. Nuclear GCaMP6f (expressed only in neurons) was used to distinguish  
326 between neuronal (GCaMP6f+) and non-GCaMP (GCaMP6f-, non-neuronal cells and HuC-  
327 neurons) cells. Anti-GABA staining was used to distinguish between non-GABAergic and  
328 GABAergic (inhibitory) neurons (Cui et al., 2005) (Fig. 3C). Since glycinergic neurons are not  
329 present in the retinorecipient areas, non-GABAergic retinorecipient neurons are predominantly  
330 excitatory. After CMTK, all TRAS labeled cells were converted into Z-Brain coordinates and  
331 categorized into three types: excitatory neurons (GCaMP6f+, GABA-) inhibitory neurons  
332 (GCaMP6f+, GABA+), and non-GCaMP cells. In total, 24 wild-type and 26 *dscaml1*<sup>-/-</sup> fish (see next  
333 section) were analyzed (Fig. 4A-B, supplementary video 2, supplemental Figure S3). The overall  
334 ratio of excitatory versus inhibitory cells was similar between wild-type and *dscaml1*<sup>-/-</sup> cohorts  
335 ( $p=0.515$ , Chi-square= 0.424). The annotated stack could be viewed with the Z-Brain off-line  
336 viewer and overlaid with anatomical annotations and reference stacks therein (Randlett et al.,  
337 2015).

338 We also verified that Z-Brain registered stacks could be used as templates for tracing the  
339 efferent projections of retinorecipient cells (Fig. 4C). We acquired both high-resolution and low-  
340 resolution image stacks for the same fish and used the high-resolution image stacks for tracing  
341 and low-resolution image stacks as the template to register to Z-Brain. We observed ipsilateral  
342 and commissural axon tracts, with morphologies that are similar to the tectal efferent tracts

343 described in previous studies (Sato et al., 2007; Helmbrecht et al., 2018).

#### 344 **Comparative analysis of retinofugal connectivity**

345 In addition to normal patterns of retinofugal connectivity, TRAS and Z-Brain can be used  
346 to investigate retinofugal connectivity patterns in mutants with visual deficits. We focused on  
347 *Down Syndrome Cell Adhesion Molecule Like-1 (DSCAML1)*, a gene mutated in patients with  
348 autism spectrum disorder, cortical abnormalities, and developmental disorders (Iossifov et al.,  
349 2014; Karaca et al., 2015; Deciphering Developmental Disorders Study, 2017). In zebrafish,  
350 *dscaml1* is broadly expressed in visual areas and required for visual and visuomotor behaviors,  
351 suggesting an underlying visual circuit deficit (Ma et al., 2019). Therefore, we compared the  
352 retinofugal connectivity patterns between 5.5 dpf wild-type fish and their *dscaml1* mutant  
353 (*dscaml1*<sup>-/-</sup>) siblings.

354 We first asked whether loss of *dscaml1* affected the topographical distribution of  
355 retinorecipient neurons (340 and 267 in wild type and *dscaml1*<sup>-/-</sup>, respectively) (Fig. 5). As the  
356 initial site of viral infection was in the temporal retina, these retinorecipient neurons likely  
357 respond to frontal visual stimulus. The overall distribution was similar between cohorts along the  
358 three cardinal axes, but the proportion of retinorecipient cells was significantly shifted in the  
359 rostral-caudal and lateral-medial axes. Along the rostral-caudal axis, both excitatory and  
360 inhibitory retinorecipient neurons from the *dscaml1*<sup>-/-</sup> cohort were more rostrally distributed,  
361 compared to wild type ( $p < 0.001$  and  $p < 0.05$  for excitatory and inhibitory neurons, respectively,  
362 K-S test). Along the dorsal-ventral axis, the effect of *dscaml1* deficiency was milder. *dscaml1*<sup>-/-</sup>

363 retinorecipient cells were more dorsally distributed, compared to wild type, but only for  
364 excitatory neurons ( $p < 0.05$ , K-S test). There were no differences in lateral-medial distribution.  
365 These results suggest that loss of *dscaml1* may affect the topographic mapping of visual inputs,  
366 particularly along the rostral-caudal axes.

367       Next, we focused on the distribution of retinorecipient cells within specific annotated  
368 brain regions. We adapted the Z-Brain quantification tools to measure the sum pixel intensity  
369 derived from TRAS-labeled cells for each region (see methods). Among regions defined by  
370 anatomy (i.e., not defined by transgene expression), 16 were found to contain, on average, at  
371 least 1 retinorecipient cell per animal in the wild-type cohort (Fig. 6A, Supplementary Figure S4).  
372 Two major brain divisions, the mesencephalon and rhombencephalon, encompassed all of the  
373 retinorecipient cells. Within these divisions, the retinorecipient cells are located within  
374 subregions corresponding to known to receive retinofugal input, including the preoptic area,  
375 hypothalamus, thalamus, eminentia thalami, pretectum, and optic tectum (tectum neuropil,  
376 tectum stratum periventriculare, and medial tectal band) (Burrill and Easter Jr, 1994; Zhang et al.,  
377 2017; Helmbrecht et al., 2018; Kramer et al., 2019). We saw no cellular labeling in the olfactory  
378 bulb (which innervates the retina), indicating that lentivirus complementation did not facilitate  
379 retrograde spread (Li and Dowling, 2000). We also identified several retinorecipient areas that, to  
380 the best of our knowledge, had not previously been identified (torus semicircularis, tegmentum,  
381 posterior tuberculum).

382       In general, the same areas were innervated in both wild-type and *dscaml1*<sup>-/-</sup> cohorts,  
383 except for two smaller areas that were not innervated in the *dscaml1*<sup>-/-</sup> cohort (eminentia

384 thalami and intermediate hypothalamus) (Fig. 6A-B). This result indicates that major  
385 retinorecipient areas are innervated by the optic nerve in the *dscaml1*<sup>-/-</sup> animals. Interestingly,  
386 the ratio of excitatory versus inhibitory retinorecipient cells (E/I ratio) was more variable in the  
387 *dscaml1*<sup>-/-</sup> cohort, compared to wild type. This was true both for major brain divisions  
388 (diencephalon vs. mesencephalon) and subregions (Fig. 6C-D). A possible explanation for this  
389 might be that loss of *dscaml1* affects the targeting of specific cell types within each retinorecipient  
390 region.

### 391 **TRAS mapping of habenular-recipient neurons**

392 Finally, to test whether TRAS can be applied more generally to other CNS neuronal  
393 populations besides RGCs, we examined efferent targeting from the left habenula (Bianco and  
394 Wilson, 2009; Amo et al., 2010; Lee et al., 2010; Dreosti et al., 2014; Duboue et al., 2017; Zhang  
395 et al., 2017). The bilaterally asymmetrical habenula receives many different sensory cues and is  
396 involved in processing social cues, fear learning, and avoidance. The left habenula is known  
397 projects to the interpeduncular nucleus (IPN) and superior raphe, providing a suitable pathway  
398 to test TRAS mapping (Bianco and Wilson, 2009; Amo et al., 2010). TRAS labeling and image  
399 registration were performed as described above, except that virus were injected in the left  
400 habenula of wild-type fish. Registered image stacks from five animals with selective left habenula  
401 labeling were combined (Fig. 7A-B). We observed consistent labeling of the habenular axon tract  
402 and the characteristic annular axon terminals in the IPN. Cell bodies near IPN axon terminals were  
403 manually marked (Fig. 7C-D). Consistent with previous findings, habenular target cells we labeled  
404 within the IPN and raphe nucleus (Amo et al., 2010). A group of labeled cells is located

405 immediately dorsal to the annotated superior raphe nucleus in Z-Brain, which are likely glial cells.

406 These results demonstrate the general applicability of TRAS for mapping targets of efferent axons.

407

## 408 **Discussion**

409 In this study, we developed TRAS, a new method for monosynaptic anterograde labeling  
410 in larval zebrafish. This method was applied to the retinofugal pathway and also validated in the  
411 habenula efferent pathway. We showed that TRAS could be combined with the Z-Brain image  
412 registration and quantitation pipeline to identify changes in retinofugal connectivity patterns  
413 caused by the loss of *dscaml1*. These results demonstrate the broad utility of TRAS for neural  
414 circuit studies in zebrafish.

## 415 **Trans-complementation of VSV $\Delta$ G by lentivirus**

416 The structure and function of VSV-G have been extensively studied in the context of viral  
417 entry, membrane fusion, toxicity, and subcellular transport (Dotti and Simons, 1990; Thomas et  
418 al., 1993; Ang et al., 2004; Hoffmann et al., 2010; Albertini et al., 2012; Fossati et al., 2014; Kim  
419 et al., 2017). VSV-G also determines the infectivity of VSV-G coated viruses (VSV, RABV, lentivirus,  
420 retrovirus), which is crucial for their research and clinical applications (Wickersham et al., 2013;  
421 Amirache et al., 2014; Mundell et al., 2015; Kobayashi et al., 2016). Our findings revealed a new  
422 aspect of VSV-G function, where VSV-G protein from a different viral species can be recycled to  
423 generate infectious VSV.

424           The spread of VSV $\Delta$ G from the retina to CNS neurons indicates that VSV-G on the lentivirus  
425 surface remained functional after lentivirus infection, and a portion of it was transported  
426 anterogradely from the cell body to the axon terminal. At the axon terminal, lentivirus-derived  
427 VSV-G was able to re-encapsulate the VSV nucleocapsid and mediate subsequent infection. The  
428 strategy of using lentivirus as a tool for glycoprotein complementation could potentially be  
429 applied more broadly. For example, current strategies for RABV monosynaptic tracing utilizes AAV  
430 to express RABV glycoprotein, which usually takes several weeks for sufficient glycoprotein  
431 expression (Miyamichi et al., 2011). It will be interesting to test whether rabies glycoprotein-  
432 coated lentivirus could be a more expedient method to provide glycoprotein for retrograde  
433 tracing.

#### 434 **Applying TRAS for zebrafish neural connectivity analysis**

435           Advances in viral engineering have led to new neural circuit tracing strategies utilizing  
436 replication-incompetent viruses (e.g., RABV, AAV, HSV) that are safer to use, less toxic to host cells,  
437 and have restricted (mostly monosynaptic) spread (Wickersham et al., 2007; Zingg et al., 2017;  
438 Chatterjee et al., 2018; Beier, 2019). Unfortunately, many of the transsynaptic viruses used in  
439 mammalian systems either do not infect zebrafish (e.g., AAV) or have low efficiency for  
440 transsynaptic spread (e.g., RABV) (Zhu et al., 2009; Dohaku et al., 2019). VSV, in contrast, can  
441 infect larval zebrafish and spreads robustly both anterogradely and retrogradely. However,  
442 replication-competent VSV has high cytotoxicity and can spread across multiple synapses, making  
443 it difficult to distinguish between direct versus indirect connections (Mundell et al., 2015).

444 To address these limitations and provide a tool for neural circuit mapping for larval  
445 zebrafish, we developed TRAS. TRAS utilizes recombinant VSV with genomic deletion of the  
446 glycoprotein gene (VSV $\Delta$ G). VSV $\Delta$ G can infect cells at the injection site but cannot spread.  
447 Although wild-type VSV does not cause serious illness to humans, the use of VSV $\Delta$ G further  
448 reduces the risk of exposure (Spickler, 2016). The lack of VSV-G expression from the viral genome  
449 also helps reduce toxicity to the host cell, as long-term VSV-G expression is known to be cytotoxic  
450 (Yee et al., 1994). To complement VSV $\Delta$ G, we directly provided VSV-G protein, utilizing lentivirus  
451 as the transducing reagent. Compared to transgenic or virus-induced expression, this approach is  
452 rapid and transient, therefore minimizing the cellular exposure to VSV-G. Both VSV $\Delta$ G and VSV-G  
453 coated lentivirus are available from a commercial source, making TRAS an easy method to adopt  
454 in a typical neuroscience laboratory.

455 To extend the utility of TRAS, we developed procedures to register brain images to the Z-  
456 Brain anatomical template (Randlett et al., 2015). The combination of neural circuit tracing within  
457 a standard 3D-brain atlas is the current state of the art approach for understanding neural  
458 network connections, both in zebrafish and mammalian models (Watabe-Uchida et al., 2012; Oh  
459 et al., 2014; Helmbrecht et al., 2018; Kramer et al., 2019; Kunst et al., 2019). This approach  
460 provides a more objective way to map cells and pathways onto specific brain regions across  
461 different experimental animals and promotes cross-referencing between research findings.

462 We demonstrated that TRAS and Z-Brain could be used for neural circuit mapping in  
463 efferent pathways originating from the retina and the left habenula. These are two of the better-



464 studied pathways in larval zebrafish, which allowed us to assess the specificity of TRAS for  
465 anterograde labeling of direct postsynaptic targets. Overall, TRAS identified all of the target  
466 regions described in previous studies, which gives confidence to the future application of TRAS to  
467 map unknown neural connections in zebrafish. Furthermore, given that VSV is also an  
468 anterograde tracer in mice and chicken, it will be interesting to test whether TRAS can be applied  
469 to these experimental systems for neural circuit mapping (Mundell et al., 2015).

#### 470 **Limitations and the future development of TRAS**

471 While TRAS offers many advantages as a neural circuit mapping tool, it is important to  
472 note some of the limitations of the technique. These are also areas with potential for further  
473 technological development. First, since VSV-G binds to a receptor that is widely expressed (LDL  
474 receptor) (Finkelshtein et al., 2013), VSV-G coated viruses (e.g., VSV $\Delta$ G and lentivirus) can infect  
475 most cell types. Therefore, the specificity of TRAS depends on precise injection into the brain  
476 region of interest. For brain regions smaller than the habenula, a compound microscope with DIC  
477 optics would be necessary. To restrict infection to a particular cell type, it may be possible to make  
478 use of ASLV-A pseudotyped VSV $\Delta$ G that can selectively target neurons expressing an exogenous  
479 receptor, TVA (Beier et al., 2011b; Dohaku et al., 2019). However, potential interactions between  
480 virions with different envelope glycoproteins may interfere with the specificity of VSV $\Delta$ G infection  
481 (Beier et al., 2011a)

482 Second, while VSV $\Delta$ G by itself cannot spread after initial infection, it can still replicate and  
483 change the metabolism of the host cell. For instance, the VSV M protein is capable of altering host

484 cell transcription and translation. Chronic VSV $\Delta$ G infection would likely affect the survival of  
485 infected neurons and impair its neurophysiological functions. Several approaches for reducing the  
486 toxicity of RABV have been reported recently to reduce the function or expression of viral proteins,  
487 such as destabilizing the RABV nucleoprotein or deleting the RABV L gene (Ciabatti et al., 2017;  
488 Chatterjee et al., 2018). Similar manipulations may also reduce the toxicity of VSV.

489 Third, we observed TRAS labeling of cells that do not express the *HuC:H2B-GCaMP6f*  
490 transgene (non-GCaMP cells), which may be glial cells. While not frequently discussed, viral  
491 transmission from neuron to glia does occur for most viral transsynaptic tracers, including PRBV,  
492 HSV, RABV, and VSV (Beier, 2019). In a replication-competent virus, the infection of glia and  
493 subsequent spread to neurons would make it challenging to infer connectivity. This issue is  
494 circumvented in TRAS, as VSV $\Delta$ G cannot spread after glial infection (due to the lack of VSV-G).  
495 Nevertheless, this highlights the importance of distinguishing bona fide neurons versus other cell  
496 types in any type of transsynaptic labeling study.

497 Lastly, quantitation by Z-Brain depends on morphing and registration of image stacks to a  
498 reference template, followed by manual identification of labeled neurons. This approach is  
499 suitable to test the effects of single genes or pathological states, but likely too laborious as a  
500 screening tool to identify candidate genes or screen drugs. Selective fluorescent labeling of  
501 neuronal cell bodies (without labeling neurites) and automation of cell detection would be a  
502 crucial next step to improve the utility of TRAS.

### 503 **Connectivity patterns associated with *dscaml1* deficiency**

504           The ability to quantitate efferent connections prompted us to investigate whether TRAS  
505 can be used to identify connectivity deficits caused by *dscaml1* deficiency. As mentioned  
506 previously, human DSCAML1 mutations are believed to be causative for neurodevelopmental  
507 disorders. Additionally, our recent work has found that loss of *dscaml1* significantly impaired  
508 visuomotor function associated with light perception and eye movements, suggesting a possible  
509 underlying deficit along the visual pathway (Ma et al., 2019).

510           Using TRAS and Z-Brain quantification, we found that *dscaml1* deficiency might have a role  
511 in refining the retinofugal topography and cell-type specificity. On a broader scale, we saw similar  
512 patterns of topographic and region-specific projections between wild-type and *dscaml1*<sup>-/-</sup>  
513 cohorts (Fig. 6, 7). This indicated that RGC axonal targeting was mostly intact in the *dscaml1*  
514 mutants. Interestingly, there was a significant rostral shift in the position in both excitatory and  
515 inhibitory retinorecipient cells. Given that RGC axon terminals and retinorecipient cells are both  
516 topographically organized, this shift in positioning may result in diminished spatial perception  
517 (Stuermer, 1988; Muto et al., 2013; Robles et al., 2014). We also observed a trend for altered ratio  
518 of excitatory versus inhibitory retinorecipient cells in the *dscaml1* mutants. For example, the  
519 preoptic area and tegementum have higher a ratio of inhibitory neurons in the *dscaml1* mutants,  
520 compared to wild type. This putative change in retinofugal target selection could lead to network  
521 changes and altered visual response. Further physiological studies will be needed to formally test  
522 whether *dscaml1* affects spatial perception and the excitatory/inhibitory balance in the visual  
523 pathway.

## 524 **Conclusions**

525           Here we present the development of a new technique (TRAS) that is suitable for mapping  
526 neural connectivity in zebrafish. TRAS makes use of a novel lentivirus trans-complementation  
527 approach to enable restricted anterograde transneuronal spread by recombinant VSV. We have  
528 validated this method in two efferent pathways and identified potential connectivity pattern  
529 changes caused by a genetic deficiency in *dscaml1*, a neuronal cell adhesion molecule associated  
530 with human neurodevelopmental disorders. The ability of TRAS to map structural connectivity  
531 would enable the discovery of new neural connections and complement existing brain mapping  
532 efforts.

## 533 **Author Contributions**

534 M.M., S.K., and Y.A.P. conceived the study, performed the experiments, and analyzed the data.  
535 S.K. prepared and characterized recombinant viruses. M.M. and Y.A.P. wrote the manuscript, with  
536 contributions from S.K.

## 537 **Figure Legends**

538 **Figure. 1. Lentivirus enabled in vitro and in vivo trans-complementation of VSV $\Delta$ G and**  
539 **transneuronal spread. A-C, lentivirus trans-complementation in vitro. VSV $\Delta$ G was able to infect**  
540 **293T cells but was unable to spread to neighboring cells, as evident by sparse single-cell infections.**  
541 **(A). In conjunction with lentivirus, VSV $\Delta$ G was able to both infect and spread, as evident by the**  
542 **presence of large infected plaques (B). The extent of VSV $\Delta$ G amplification (as measured by viral**

543 titer) is positively correlated with lentivirus titer, expressed in m.o.i. (C). **D**, Illustration of viral  
544 injection and labeling of the optic nerve. Virus was microinjected into the left eye, which infected  
545 the RGC and resulted in fluorescent labeling of the RGC axons (i.e., optic nerve, magenta). The  
546 layout of the larval CNS is labeled in green, with the olfactory bulb (OB), pallium (P), habenula (H),  
547 optic tectum (OT), and cerebellum (Cb) labeled. **E-H**, In vivo trans-complementation and spread  
548 of VSVΔG by lentivirus. In the absence of lentivirus, VSVΔG infected RGCs and fluorescently  
549 labeled the optic nerve, but no spread in the CNS was observed (E). When lentivirus and VSVΔG  
550 were coinjected, cellular labeling was observed in the CNS (yellow arrowheads), indicating  
551 transneuronal spread. Similar patterns of spread was also seen at very high VSVΔG titer ( $2 \times 10^9$   
552 versus  $10^8$  ffu/ml for panels E-G), suggesting that VSVΔG was able to self-complement (H). **I-L**,  
553 Time course of VSVΔG infection and spread with lentivirus trans-complementation, with RFP  
554 expression from VSVΔG (magenta) and GFP expression from the *vglut2a:GFP* transgene (green).  
555 Box regions are shown at higher magnifications below (I'-L'). Scale bars are 100 μm. Images in the  
556 same row are shown at the same scale.

557 **Figure 2. Efferent projections of retinorecipient cells.** **A-A'**, Confocal maximal intensity projection  
558 (dorsal view) of TRAS-labeled larva, with RFP expression from VSVΔG in magenta (A) or white (A').  
559 Axon projections can be seen in the pallium (P), optic tectum (OT), cerebellum (Cb), and hindbrain  
560 (Hb). **B-E**, Maximal intensity projection confocal substacks that contained the pallium (B),  
561 habenula (C), hypothalamus (D), and cerebellum (E). RFP expression from VSVΔG (magenta) and  
562 GFP expression from the *vglut2a:GFP* transgene (green) are shown in B-E, while boxed region is

563 shown at higher magnification in B'-E', with only the RFP channel (white). Scale bars are 100  $\mu$ m  
564 in A and B, and 50  $\mu$ m in B'. Images in the same row are shown at the same scale.

565 **Figure 3. Cell-type characterization of TRAS labeling.** **A**, The workflow for TRAS labeling, tissue  
566 processing, image acquisition, and data analysis. **B**, Orthogonal views of an imaged fish after  
567 tissue clearing with sRIMS. Orthogonal views (XY, XZ, and YZ) of confocal image stacks are shown.  
568 **C-C'**, Cytochemical characterization of TRAS-labeled cells. A single confocal imaging plane is  
569 shown, with merged, GCaMP6f, GABA, and VSV $\Delta$ G channels as indicated. Boxed area in C is shown  
570 in higher magnification in C'. The purple arrowhead marks a GCaMP6f+/GABA+/VSV $\Delta$ G+  
571 inhibitory neuron. The yellow arrowhead marks a GCaMP6f+/GABA-/VSV $\Delta$ G+ excitatory neuron.  
572 Scale bars are 100  $\mu$ m.

573 **Figure 4. Annotation of TRAS-labeled neurons and efferent axons in the Z-Brain standard brain**  
574 **reference.** **A**, Overview of all annotated TRAS-labeled retinorecipient cells within the wild-type  
575 and *dscaml1*<sup>-/-</sup> cohorts. **B**, Spatial layout of TRAS-labeled neurons (dorsal view, rostral to the left)  
576 overlaid onto the Z-brain reference brain scale, for wild-type (top row) and *dscaml1*<sup>-/-</sup> (bottom  
577 row) cohorts. Green dots mark excitatory neurons, magenta dots mark inhibitory neurons. **C-E**,  
578 Efferent tract tracing from wild-type larvae (n=10). Maximum Z-projection is shown for confocal  
579 image (C), traced ipsilateral tracts (D), and commissural tracts (E). Axons with similar trajectories  
580 are displayed in the same color. Scale bars are 100 $\mu$ m.

581 **Figure 5. Topographical organization of retinorecipient neurons in wild-type and *dscaml1*<sup>-/-</sup>**  
582 **cohorts.** Graphs show the topographical distribution of excitatory (A, B) and inhibitory neurons

583 (C, D) in wild-type (black, n=24) and *dscaml1*<sup>-/-</sup> (red, n=26) cohorts. Axes are relative distances  
584 (pixels) within the Z-Brain reference brain stack. **A, C**, Three-dimensional distribution of excitatory  
585 (A) and inhibitory (C) neurons. **B, D**, Frequency distributions of excitatory (B) and inhibitory (D)  
586 neurons in the rostral-caudal, dorsal-ventral, and lateral-medial axes. Dashed lines indicate the  
587 boundary between the diencephalon and the mesencephalon. K-S test, \*: P<0.05 ; \*\*\*: P<0.001.

588 **Figure 6 Retinorecipient cell distribution and excitatory-inhibitory balance in major anatomical**  
589 **regions. A-B**, Axes show estimated cell numbers (converted from intensity signals) in each region  
590 in wild-type (A, n=24) and *dscaml1*<sup>-/-</sup> (B, n=26) cohorts. **C-D**, Excitatory/inhibitory ratio for all  
591 labeled non-zero regions in both wild-type (n=24) and *dscaml1*<sup>-/-</sup> (n=26), listed in **A** and **B**. **C**,  
592 Excitatory/inhibitory ratio comparison of diencephalon and mesencephalon. **D**,  
593 Excitatory/inhibitory ratio comparison of subregions within diencephalon and mesencephalon.

594 **Figure 7. TRAS labeling of habenular target cells.** Dorsal views (A-B, C-D) and lateral views (A'-B',  
595 C'-D') are shown. **A-B**, Maximal projection of registered image stacks from animals with initial  
596 infection in the left habenula (arrowhead). Habenular efferent tract projects into the IPN (arrow).  
597 RFP expression from VSVΔG infection is shown in magenta (A-A') or white (B-B'). For anatomical  
598 reference, images are overlaid on top of the Z-Brain ERK1/2 reference stack (green, A-A'), or  
599 region outlines for the habenula (yellow), IPN (cyan), and raphe nucleus (red) (B-B'). **C-D**,  
600 Manually marked habenular target cells (magenta in C-C', white in D-D') are overlaid on top of  
601 anatomical references, as described for panels A-B. Scale bars are 100 μm. All images are shown  
602 at the same scale.

603 **Supplementary Figure S1. Examples of secondary TRAS labeling.** Red arrowheads indicate  
604 secondary spread due to a higher titer of virus. Yellow dash line marks the border of  
605 mesencephalon and cerebellum. Scale bar: 50  $\mu\text{m}$ .

606 **Supplementary Figure S2. Tissue clearing with sRIMS solution.** Whole-mount ERK1/2  
607 immunolabeling without (A) or with sRIMS clearing (B). Orthogonal views (XY, XZ, and YZ) of  
608 confocal image stacks are shown, centered just bellowed the cerebellum (intersect of yellow lines).  
609 Ventral structures are not visible without sRIMS clearing. Scale bars are 100  $\mu\text{m}$ .

610 **Supplementary Figure S3. TRAS labeling of non-neuronal cells.** A single confocal imaging plane  
611 is shown, with merged, GCaMPf, GABA, and VSV $\Delta$ G channels as indicated. Boxed area in A is  
612 shown in higher magnification in A'. The purple arrowheads mark two  
613 GCaMP6f+/GABA+/VSV $\Delta$ G+ inhibitory neurons. The orange arrowhead marks a GCaMP6f-/GABA-  
614 /VSV $\Delta$ G+ cell. Scale bars are 100  $\mu\text{m}$ .

615 **Supplementary Figure S4. Signals detected via Z-brain in wild-type and *dscaml1*<sup>-/-</sup> fish. A-B,**  
616 Heat map of normalized signals in major anatomical regions from Z-brain showing normalized  
617 signals detected within each sample used for analysis, wild-type (n=24) and *dscaml1*<sup>-/-</sup> (n=26),  
618 and their corresponding neuron types **A** is excitatory while **B** is inhibitory. All signals were  
619 descended aligning to Diencephalon.

620



## 621 **Videos**

622 **Supplementary Video 1.** Image stack of TRAS-labeled zebrafish larva, three days after the initial  
623 infection. VSV $\Delta$ G labeling is shown in magenta and *vglut2a:GFP* labeling in green.

624 **Supplementary Video 2.** Excitatory (green) and inhibitory (magenta) retinorecipient cells in wild  
625 type (left) and *dscaml1*<sup>-/-</sup> (right) cohorts. ERK1/2 immunolabeling (white) from Randlett et al.  
626 2015 is overlaid to serve as an anatomical reference.

627

## 628 **Data Availability**

629 The image stacks and other data supporting the findings of this study are available from the  
630 corresponding author upon reasonable request.

## 631 **Code Availability**

632 Custom Fiji and MATLAB scripts used of this study are available from the corresponding author  
633 upon reasonable request.

634

## 635 **References**

- 636 Abdelfattah AS et al. (2019) Bright and photostable chemigenetic indicators for extended in vivo voltage imaging.  
637 Science 365:699-704.
- 638 Ahrens MB, Orger MB, Robson DN, Li JM, Keller PJ (2013) Whole-brain functional imaging at cellular resolution using  
639 light-sheet microscopy. Nat Methods 10:413-420.
- 640 Albertini AA, Baquero E, Ferlin A, Gaudin Y (2012) Molecular and cellular aspects of rhabdovirus entry. Viruses 4:117-  
641 139.
- 642 Amirache F, Lévy C, Costa C, Mangeot P-E, Torbett BE, Wang CX, Nègre D, Cosset F-L, Verhoeven E (2014) Mystery

- 643 solved: VSV-G-LVs do not allow efficient gene transfer into unstimulated T cells, B cells, and HSCs because  
644 they lack the LDL receptor. *Blood* 123:1422.
- 645 Amo R, Aizawa H, Takahoko M, Kobayashi M, Takahashi R, Aoki T, Okamoto H (2010) Identification of the zebrafish  
646 ventral habenula as a homolog of the mammalian lateral habenula. *J Neurosci* 30:1566-1574.
- 647 Ang AL, Taguchi T, Francis S, Folsch H, Murrells LJ, Pypaert M, Warren G, Mellman I (2004) Recycling endosomes can  
648 serve as intermediates during transport from the Golgi to the plasma membrane of MDCK cells. *J Cell Biol*  
649 167:531-543.
- 650 Bae YK, Kani S, Shimizu T, Tanabe K, Nojima H, Kimura Y, Higashijima S, Hibi M (2009) Anatomy of zebrafish cerebellum  
651 and screen for mutations affecting its development. *Dev Biol* 330:406-426.
- 652 Beier KT (2019) Hitchhiking on the neuronal highway: Mechanisms of transsynaptic specificity. *Journal of chemical*  
653 *neuroanatomy* 99:9-17.
- 654 Beier KT, Samson MES, Matsuda T, Cepko CL (2011a) Conditional expression of the TVA receptor allows clonal analysis  
655 of descendants from Cre-expressing progenitor cells. *Developmental Biology* 353:309-320.
- 656 Beier KT, Mundell NA, Pan YA, Cepko CL (2016) Anterograde or Retrograde Transsynaptic Circuit Tracing in Vertebrates  
657 with Vesicular Stomatitis Virus Vectors. *Curr Protoc Neurosci* 74:1 26 21-27.
- 658 Beier KT, Saunders AB, Oldenburg IA, Sabatini BL, Cepko CL (2013) Vesicular stomatitis virus with the rabies virus  
659 glycoprotein directs retrograde transsynaptic transport among neurons in vivo. *Frontiers in neural circuits*  
660 7:11.
- 661 Beier KT, Saunders A, Oldenburg IA, Miyamichi K, Akhtar N, Luo L, Whelan SP, Sabatini B, Cepko CL (2011b)  
662 Anterograde or retrograde transsynaptic labeling of CNS neurons with vesicular stomatitis virus vectors.  
663 *Proceedings of the National Academy of Sciences of the United States of America* 108:15414-15419.
- 664 Belmonte MK, Allen G, Beckel-Mitchener A, Boulanger LM, Carper RA, Webb SJ (2004) Autism and abnormal  
665 development of brain connectivity. *J Neurosci* 24:9228-9231.
- 666 Bianco IH, Wilson SW (2009) The habenular nuclei: a conserved asymmetric relay station in the vertebrate brain.  
667 *Philosophical transactions of the Royal Society of London Series B, Biological sciences* 364:1005-1020.
- 668 Burrill JD, Easter Jr SS (1994) Development of the retinofugal projections in the embryonic and larval zebrafish  
669 (*Brachydanio rerio*). *Journal of Comparative Neurology* 346:583-600.
- 670 Chatterjee S et al. (2018) Nontoxic, double-deletion-mutant rabies viral vectors for retrograde targeting of projection  
671 neurons. *Nat Neurosci*.
- 672 Chen X, Mu Y, Hu Y, Kuan AT, Nikitchenko M, Randlett O, Chen AB, Gavornik JP, Sompolinsky H, Engert F, Ahrens MB  
673 (2018) Brain-wide Organization of Neuronal Activity and Convergent Sensorimotor Transformations in Larval  
674 Zebrafish. *Neuron* 100:876-890 e875.
- 675 Ciabatti E, Gonzalez-Rueda A, Mariotti L, Morgese F, Tripodi M (2017) Life-Long Genetic and Functional Access to  
676 Neural Circuits Using Self-Inactivating Rabies Virus. *Cell* 170:382-392.e314.
- 677 Cui WW, Low SE, Hirata H, Saint-Amant L, Geisler R, Hume RI, Kuwada JY (2005) The Zebrafish *shocked*  
678 Gene Encodes a Glycine Transporter and Is Essential for the Function of Early Neural Circuits in the CNS. *The*  
679 *Journal of Neuroscience* 25:6610-6620.
- 680 Deciphering Developmental Disorders Study (2017) Prevalence and architecture of de novo mutations in  
681 developmental disorders. *Nature* 542:433-438.
- 682 Dohaku R, Yamaguchi M, Yamamoto N, Shimizu T, Osakada F, Hibi M (2019) Tracing of Afferent Connections in the  
683 Zebrafish Cerebellum Using Recombinant Rabies Virus. *Frontiers in neural circuits* 13:30.
- 684 Dotti CG, Simons K (1990) Polarized sorting of viral glycoproteins to the axon and dendrites of hippocampal neurons  
685 in culture. *Cell* 62:63-72.
- 686 Dreosti E, Vendrell Llopis N, Carl M, Yaksi E, Wilson SW (2014) Left-right asymmetry is required for the habenulae to  
687 respond to both visual and olfactory stimuli. *Curr Biol* 24:440-445.
- 688 Duboue ER, Hong E, Eldred KC, Halpern ME (2017) Left Habenular Activity Attenuates Fear Responses in Larval  
689 Zebrafish. *Curr Biol* 27:2154-2162 e2153.
- 690 Feng L, Zhao T, Kim J (2015) neuTube 1.0: A New Design for Efficient Neuron Reconstruction Software Based on the  
691 SWC Format. *eNeuro* 2.
- 692 Finkelshtein D, Werman A, Novick D, Barak S, Rubinstein M (2013) LDL receptor and its family members serve as the

- 693 cellular receptors for vesicular stomatitis virus. *Proceedings of the National Academy of Sciences of the*  
694 *United States of America* 110:7306-7311.
- 695 Fornito A, Zalesky A, Breakspear M (2015) The connectomics of brain disorders. *Nature Reviews Neuroscience* 16:159.
- 696 Fossati M, Colombo SF, Borgese N (2014) A positive signal prevents secretory membrane cargo from recycling  
697 between the Golgi and the ER. *Embo j* 33:2080-2097.
- 698 Fuerst PG, Bruce F, Tian M, Wei W, Elstrott J, Feller MB, Erskine L, Singer JH, Burgess RW (2009) DSCAM and DSCAML1  
699 function in self-avoidance in multiple cell types in the developing mouse retina. *Neuron* 64:484-497.
- 700 Galicia CA, Sukeena JM, Stenkamp DL, Fuerst PG (2018) Expression patterns of dscam and sdk gene paralogs in  
701 developing zebrafish retina. *Molecular vision* 24:443-458.
- 702 Glasser MF, Coalson TS, Robinson EC, Hacker CD, Harwell J, Yacoub E, Ugurbil K, Andersson J, Beckmann CF, Jenkinson  
703 M, Smith SM, Van Essen DC (2016) A multi-modal parcellation of human cerebral cortex. *Nature* 536:171.
- 704 Helmbrecht TO, Dal Maschio M, Donovan JC, Koutsouli S, Baier H (2018) Topography of a Visuomotor Transformation.  
705 *Neuron*.
- 706 Hildebrand DGC et al. (2017) Whole-brain serial-section electron microscopy in larval zebrafish. *Nature* 545:345-349.
- 707 Hoffmann M, Wu YJ, Gerber M, Berger-Rentsch M, Heimrich B, Schwemmler M, Zimmer G (2010) Fusion-active  
708 glycoprotein G mediates the cytotoxicity of vesicular stomatitis virus M mutants lacking host shut-off activity.  
709 *The Journal of general virology* 91:2782-2793.
- 710 Iossifov I et al. (2014) The contribution of de novo coding mutations to autism spectrum disorder. *Nature* 515:216-  
711 221.
- 712 Jefferis GS, Potter CJ, Chan AM, Marin EC, Rohlfsing T, Maurer CR, Jr., Luo L (2007) Comprehensive maps of *Drosophila*  
713 higher olfactory centers: spatially segregated fruit and pheromone representation. *Cell* 128:1187-1203.
- 714 Karaca E et al. (2015) Genes that Affect Brain Structure and Function Identified by Rare Variant Analyses of Mendelian  
715 Neurologic Disease. *Neuron* 88:499-513.
- 716 Kasthuri N et al. (2015) Saturated Reconstruction of a Volume of Neocortex. *Cell* 162:648-661.
- 717 Kawashima T, Zwart MF, Yang CT, Mensh BD, Ahrens MB (2016) The Serotonergic System Tracks the Outcomes of  
718 Actions to Mediate Short-Term Motor Learning. *Cell* 167:933-946 e920.
- 719 Kim IS, Jenni S, Stanifer ML, Roth E, Whelan SP, van Oijen AM, Harrison SC (2017) Mechanism of membrane fusion  
720 induced by vesicular stomatitis virus G protein. *Proceedings of the National Academy of Sciences of the*  
721 *United States of America* 114:E28-E36.
- 722 Kimmel CB, Ballard WW, Kimmel SR, Ullmann B, Schilling TF (1995) Stages of embryonic development of the zebrafish.  
723 *Dev Dyn* 203:253-310.
- 724 Kobayashi K, Kato S, Inoue K, Takada M, Kobayashi K (2016) Altering Entry Site Preference of Lentiviral Vectors into  
725 Neuronal Cells by Pseudotyping with Envelope Glycoproteins. *Methods in molecular biology* 1382:175-186.
- 726 Kramer A, Wu Y, Baier H, Kubo F (2019) Neuronal Architecture of a Visual Center that Processes Optic Flow. *Neuron*.
- 727 Kunst M, Laurell E, Mokayes N, Kramer A, Kubo F, Fernandes AM, Förster D, Dal Maschio M, Baier H (2019) A Cellular-  
728 Resolution Atlas of the Larval Zebrafish Brain. *Neuron*.
- 729 Lee A, Mathuru AS, Teh C, Kibat C, Korzh V, Penney TB, Jesuthasan S (2010) The habenula prevents helpless behavior  
730 in larval zebrafish. *Curr Biol* 20:2211-2216.
- 731 Li L, Dowling JE (2000) Disruption of the olfactoryretinal centrifugal pathway may relate to the visual system defect in  
732 night blindness b mutant zebrafish. *J Neurosci* 20:1883-1892.
- 733 Lynall M-E, Bassett DS, Kerwin R, McKenna PJ, Kitzbichler M, Muller U, Bullmore E (2010) Functional Connectivity and  
734 Brain Networks in Schizophrenia. *The Journal of Neuroscience* 30:9477-9487.
- 735 Ma M, Ramirez AD, Wang T, Roberts RL, Harmon KE, Schoppik D, Sharma A, Kuang C, Goei SL, Gagnon JA, Zimmerman  
736 S, Tsai SQ, Reyon D, Joung JK, Aksay ERF, Schier AF, Pan YA (2019) Zebrafish Dscaml1 is Essential for Retinal  
737 Patterning and Function of Oculomotor Subcircuits. *bioRxiv:658161*.
- 738 Maack G, Segner H (2003) Morphological development of the gonads in zebrafish. *Journal of Fish Biology* 62:895-  
739 906.
- 740 Miyamichi K, Amat F, Moussavi F, Wang C, Wickersham I, Wall NR, Taniguchi H, Tasic B, Huang ZJ, He Z, Callaway EM,  
741 Horowitz MA, Luo L (2011) Cortical representations of olfactory input by trans-synaptic tracing. *Nature*  
742 472:191-196.

- 743 Mueller T (2012) What is the Thalamus in Zebrafish? *Frontiers in neuroscience* 6:64-64.
- 744 Mundell NA, Beier KT, Pan YA, Lapan SW, Goz Ayturk D, Berezovskii VK, Wark AR, Drokhlyansky E, Bielecki J, Born RT,  
745 Schier AF, Cepko CL (2015) Vesicular stomatitis virus enables gene transfer and transsynaptic tracing in a  
746 wide range of organisms. *J Comp Neurol* 523:1639-1663.
- 747 Muto A, Ohkura M, Abe G, Nakai J, Kawakami K (2013) Real-time visualization of neuronal activity during perception.  
748 *Curr Biol* 23:307-311.
- 749 Oh SW et al. (2014) A mesoscale connectome of the mouse brain. *Nature* 508:207-214.
- 750 Orger MB, de Polavieja GG (2017) Zebrafish Behavior: Opportunities and Challenges. *Annu Rev Neurosci* 40:125-147.
- 751 Randlett O, Wee CL, Naumann EA, Nnaemeka O, Schoppik D, Fitzgerald JE, Portugues R, Lacoste AM, Riegler C, Engert  
752 F, Schier AF (2015) Whole-brain activity mapping onto a zebrafish brain atlas. *Nat Methods* 12:1039-1046.
- 753 Robles E, Laurell E, Baier H (2014) The retinal projectome reveals brain-area-specific visual representations generated  
754 by ganglion cell diversity. *Curr Biol* 24:2085-2096.
- 755 Rohlfing T, Maurer CR (2003) Nonrigid image registration in shared-memory multiprocessor environments with  
756 application to brains, breasts, and bees. *IEEE Transactions on Information Technology in Biomedicine* 7:16-  
757 25.
- 758 Sakai C, Ijaz S, Hoffman EJ (2018) Zebrafish Models of Neurodevelopmental Disorders: Past, Present, and Future.  
759 *Frontiers in molecular neuroscience* 11:294.
- 760 Sato T, Hamaoka T, Aizawa H, Hosoya T, Okamoto H (2007) Genetic single-cell mosaic analysis implicates ephrinB2  
761 reverse signaling in projections from the posterior tectum to the hindbrain in zebrafish. *J Neurosci* 27:5271-  
762 5279.
- 763 Spickler AR (2016) Vesicular Stomatitis (January, 2016). In. <http://www.cfsph.iastate.edu/DiseasesInfo/factsheets.php>.
- 764 Stuermer CA (1988) Retinotopic organization of the developing retinotectal projection in the zebrafish embryo. *J*  
765 *Neurosci* 8:4513-4530.
- 766 Svava FN, Kornfeld J, Denk W, Bollmann JH (2018) Volume EM Reconstruction of Spinal Cord Reveals Wiring Specificity  
767 in Speed-Related Motor Circuits. *Cell Rep* 23:2942-2954.
- 768 Swanson LW, Lichtman JW (2016) From Cajal to Connectome and Beyond. *Annual Review of Neuroscience* 39:197-  
769 216.
- 770 Thomas DC, Brewer CB, Roth MG (1993) Vesicular stomatitis virus glycoprotein contains a dominant cytoplasmic  
771 basolateral sorting signal critically dependent upon a tyrosine. *J Biol Chem* 268:3313-3320.
- 772 Thyme SB, Pieper LM, Li EH, Pandey S, Wang Y, Morris NS, Sha C, Choi JW, Herrera KJ, Soucy ER, Zimmerman S,  
773 Randlett O, Greenwood J, McCarroll SA, Schier AF (2019) Phenotypic Landscape of Schizophrenia-Associated  
774 Genes Defines Candidates and Their Shared Functions. *Cell* 177:478-491 e420.
- 775 Vishwanathan A, Daie K, Ramirez AD, Lichtman JW, Aksay ERF, Seung HS (2017) Electron Microscopic Reconstruction  
776 of Functionally Identified Cells in a Neural Integrator. *Curr Biol* 27:2137-2147 e2133.
- 777 Wanner AA, Genoud C, Masudi T, Siksou L, Friedrich RW (2016) Dense EM-based reconstruction of the  
778 interglomerular projectome in the zebrafish olfactory bulb. *Nat Neurosci* 19:816-825.
- 779 Watabe-Uchida M, Zhu L, Ogawa Sachie K, Vamanrao A, Uchida N (2012) Whole-Brain Mapping of Direct Inputs to  
780 Midbrain Dopamine Neurons. *Neuron* 74:858-873.
- 781 Wickersham IR, Sullivan HA, Seung HS (2013) Axonal and subcellular labelling using modified rabies viral vectors.  
782 *Nature communications* 4:2332.
- 783 Wickersham IR, Lyon DC, Barnard RJ, Mori T, Finke S, Conzelmann KK, Young JA, Callaway EM (2007) Monosynaptic  
784 restriction of transsynaptic tracing from single, genetically targeted neurons. *Neuron* 53:639-647.
- 785 Wilson CA, High SK, McCluskey BM, Amores A, Yan Y-I, Titus TA, Anderson JL, Batzel P, Carvan MJ, Schartl M,  
786 Postlethwait JH (2014) Wild Sex in Zebrafish: Loss of the Natural Sex Determinant in Domesticated Strains.  
787 *Genetics* 198:1291.
- 788 Yang B, Treweek JB, Kulkarni RP, Deverman BE, Chen CK, Lubeck E, Shah S, Cai L, Gradinaru V (2014) Single-cell  
789 phenotyping within transparent intact tissue through whole-body clearing. *Cell* 158:945-958.
- 790 Yee JK, Miyanochara A, LaPorte P, Bouic K, Burns JC, Friedmann T (1994) A general method for the generation of high-  
791 titer, pantropic retroviral vectors: highly efficient infection of primary hepatocytes. *Proceedings of the*  
792 *National Academy of Sciences* 91:9564-9568.

- 793 Zhang BB, Yao YY, Zhang HF, Kawakami K, Du JL (2017) Left Habenula Mediates Light-Preference Behavior in Zebrafish  
794 via an Asymmetrical Visual Pathway. *Neuron* 93:914-928 e914.
- 795 Zhu P, Narita Y, Bundschuh ST, Fajardo O, Scharer YP, Chattopadhyaya B, Bouldoires EA, Stepien AE, Deisseroth K,  
796 Arber S, Sprengel R, Rijli FM, Friedrich RW (2009) Optogenetic Dissection of Neuronal Circuits in Zebrafish  
797 using Viral Gene Transfer and the Tet System. *Frontiers in neural circuits* 3:21.
- 798 Zingg B, Chou XL, Zhang ZG, Mesik L, Liang F, Tao HW, Zhang LI (2017) AAV-Mediated Anterograde Transsynaptic  
799 Tagging: Mapping Corticocollicular Input-Defined Neural Pathways for Defense Behaviors. *Neuron* 93:33-47.
- 800

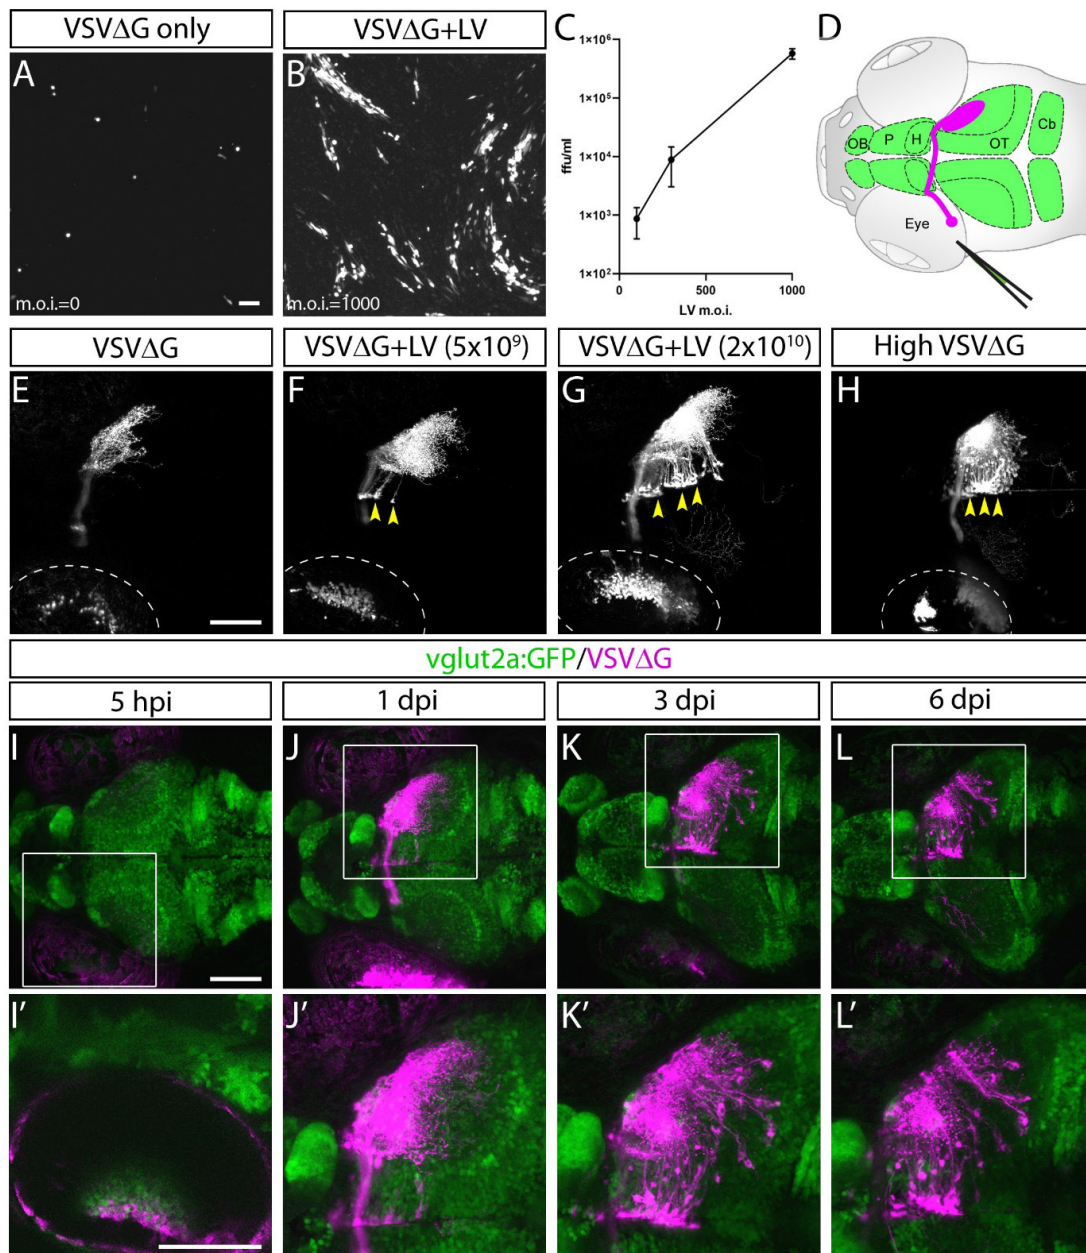

Figure 1

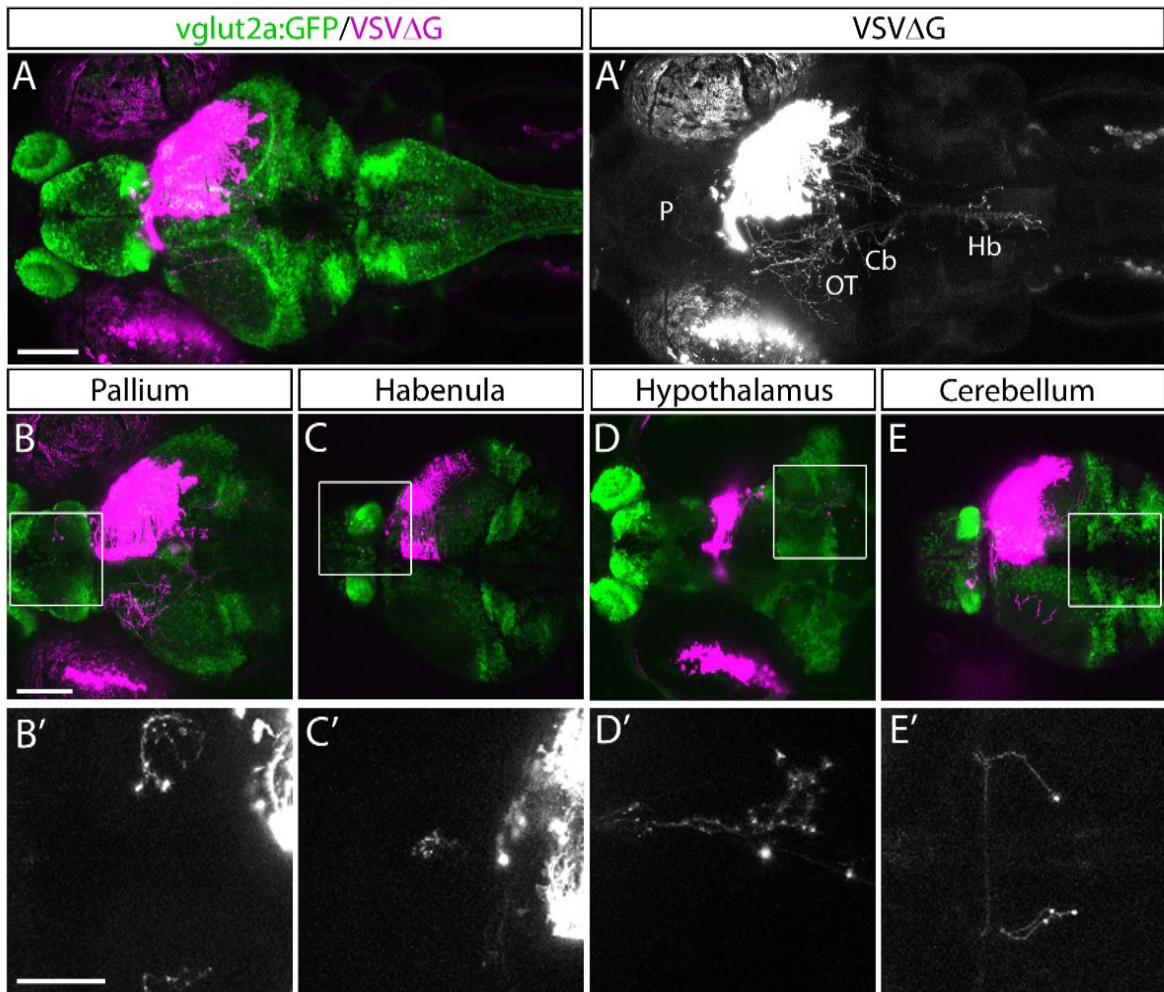

Figure 2

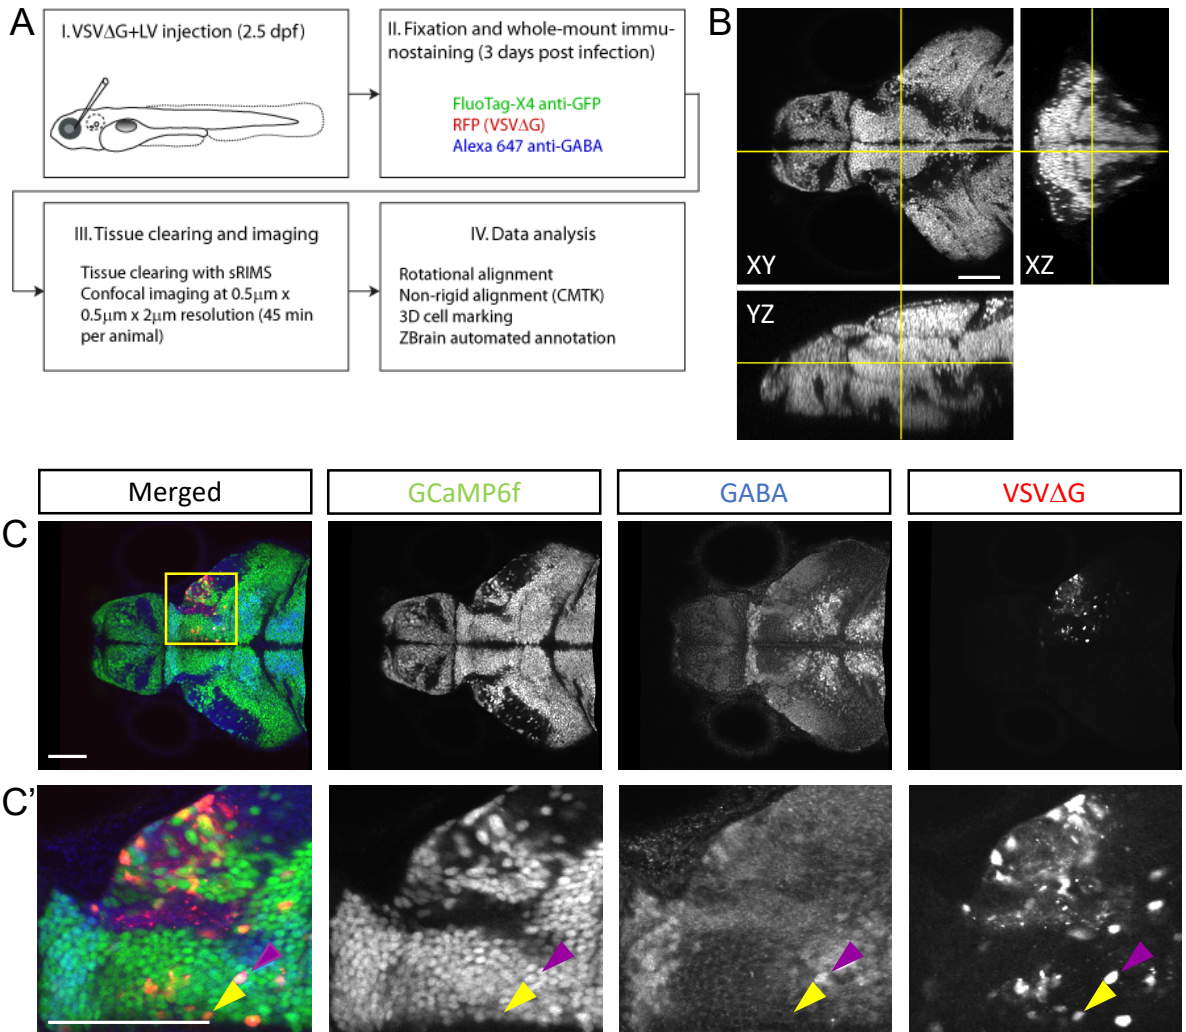

Figure 3



|                          | Wild type (n=24) | <i>dscaml1</i> <sup>-/-</sup> (n=26) |
|--------------------------|------------------|--------------------------------------|
| Total TRAS-labeled cells | 683 (100%)       | 671 (100%)                           |
| Excitatory               | 182 (26.65%)     | 150 (22.35%)                         |
| Inhibitory               | 158 (23.13%)     | 117 (17.44%)                         |
| Non-GCaMP                | 343 (50.22%)     | 404 (60.21%)                         |

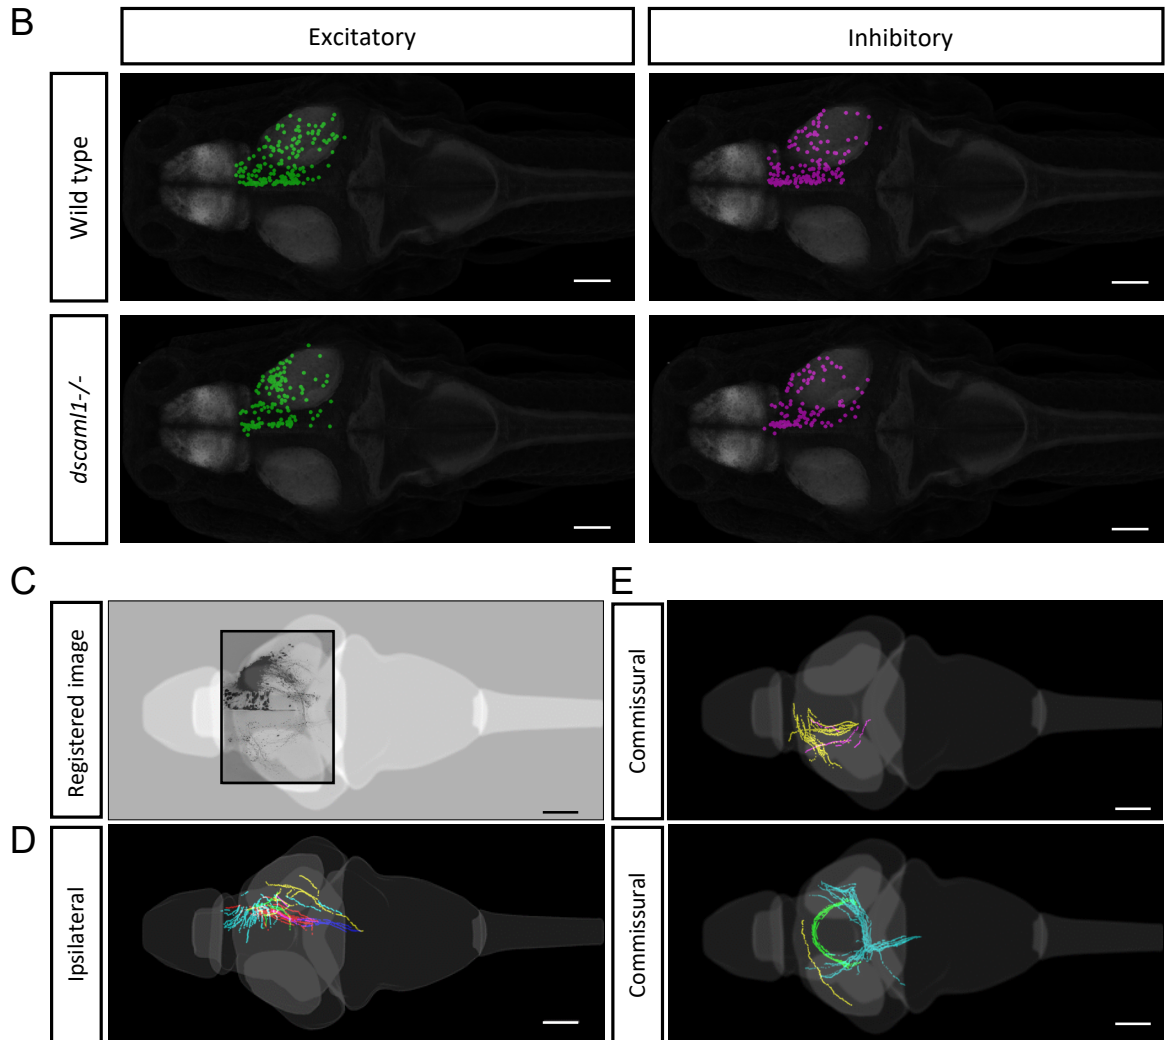

Figure 4

Excitatory

Inhibitory

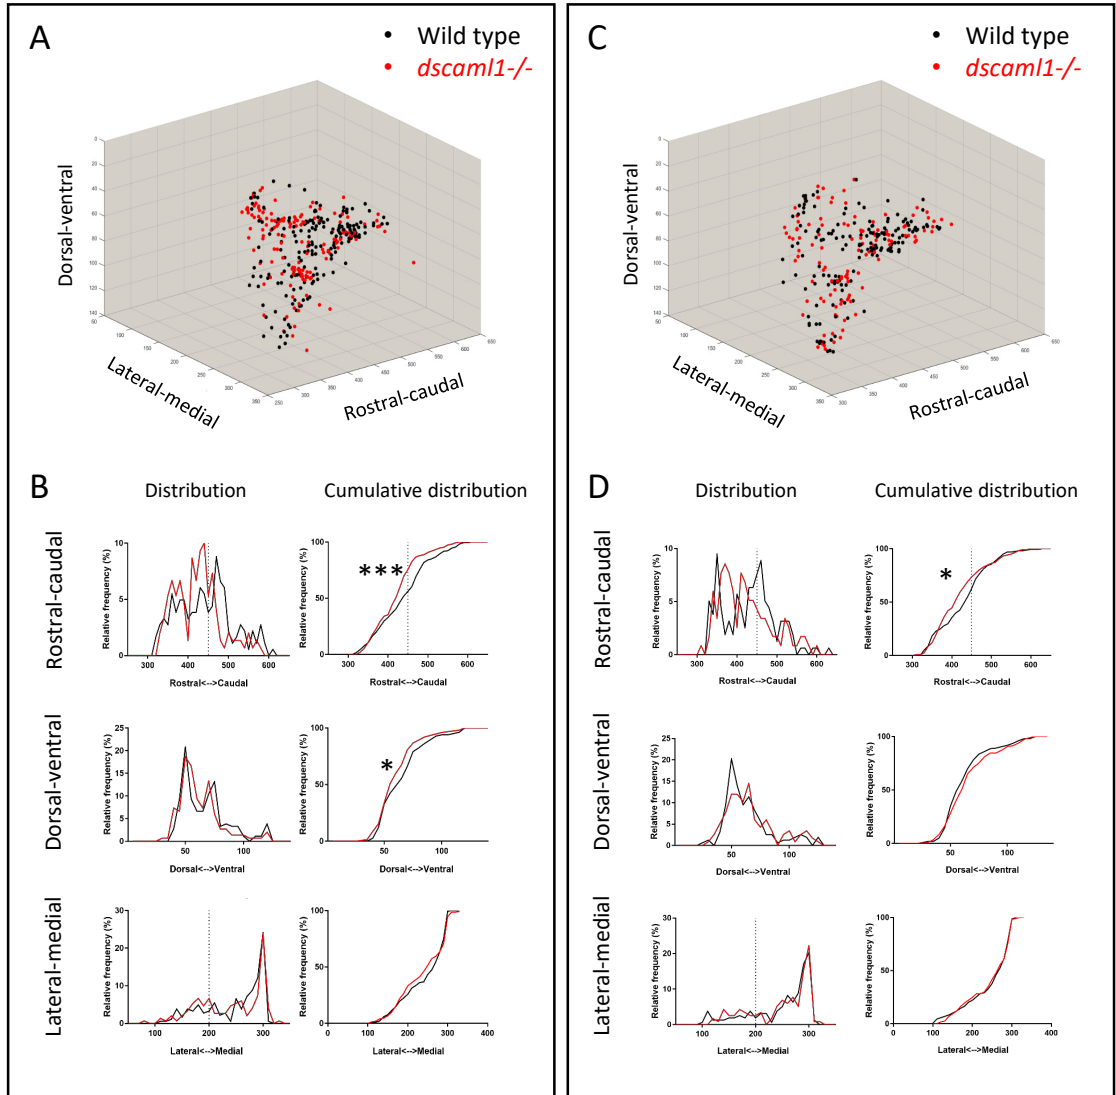

Figure 5

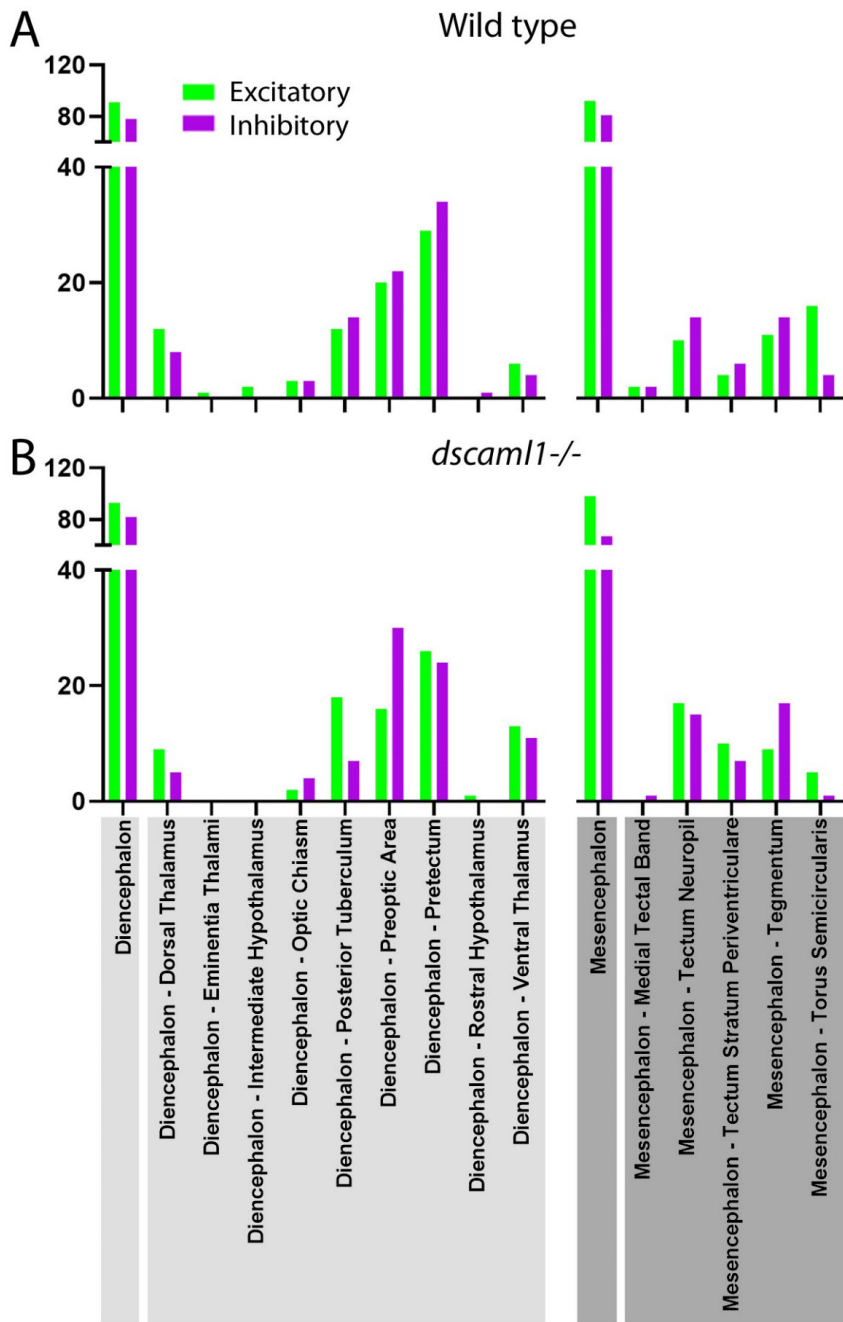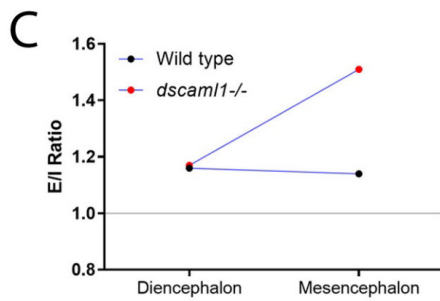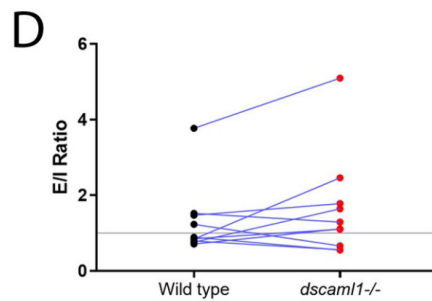

Figure 6

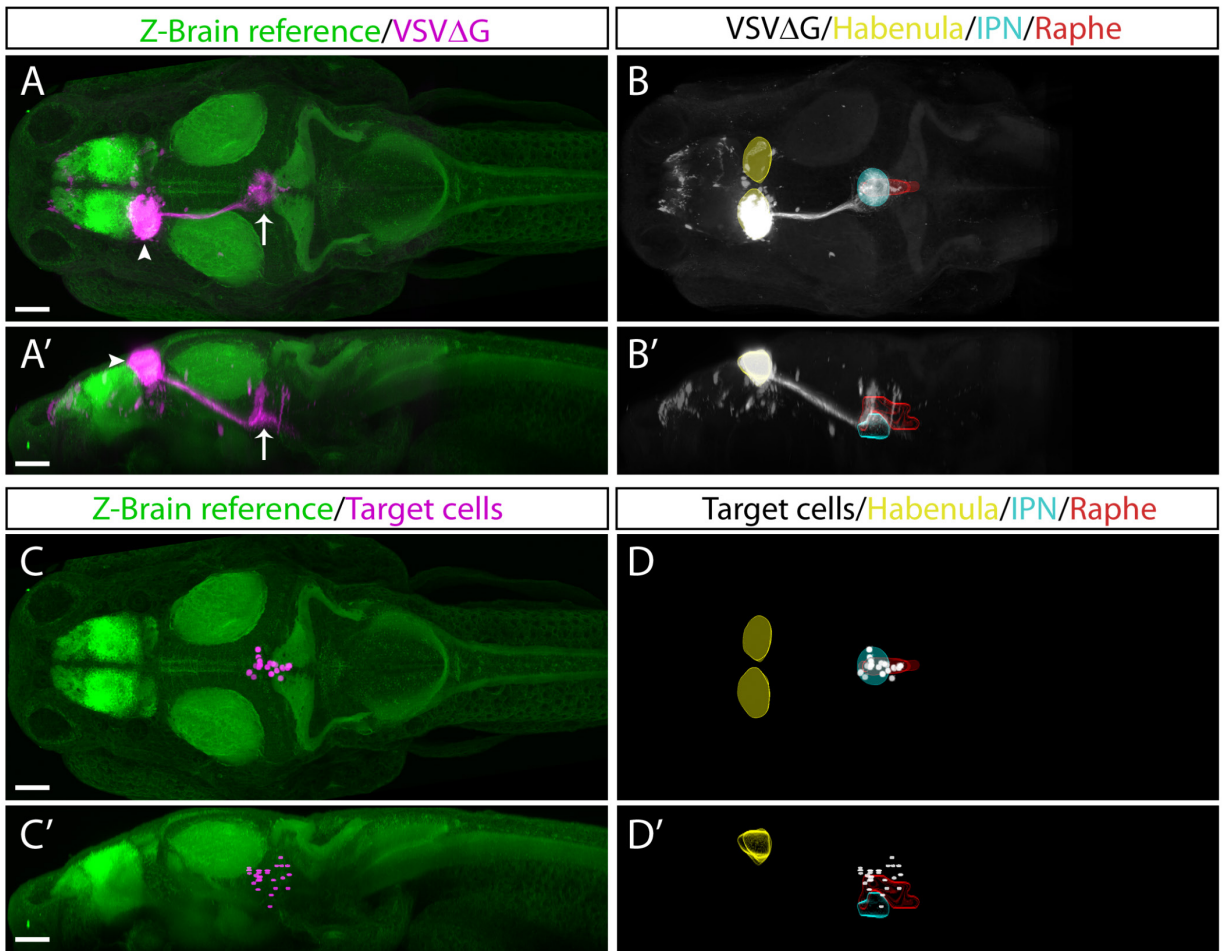

Figure 7

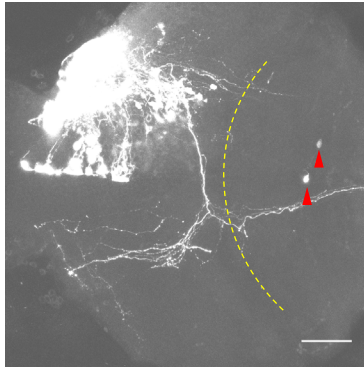

Supplementary Figure S1

A Without clearing

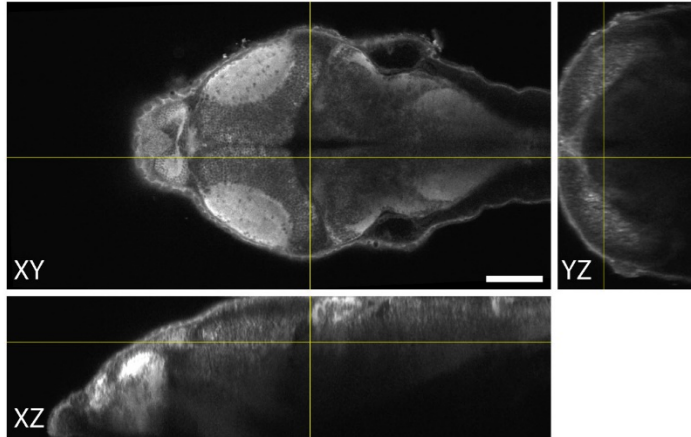

B With sRIMS clearing

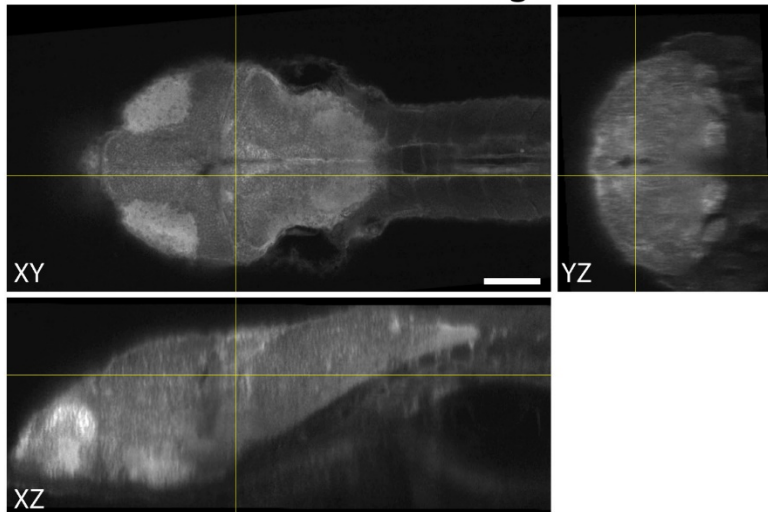

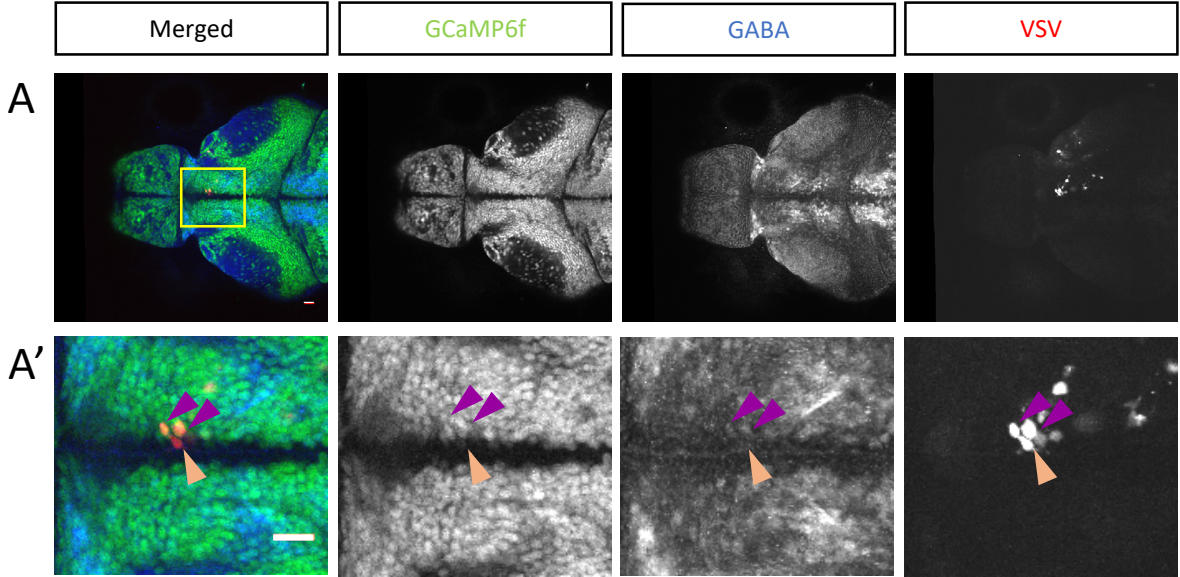

Supplementary Figure S3

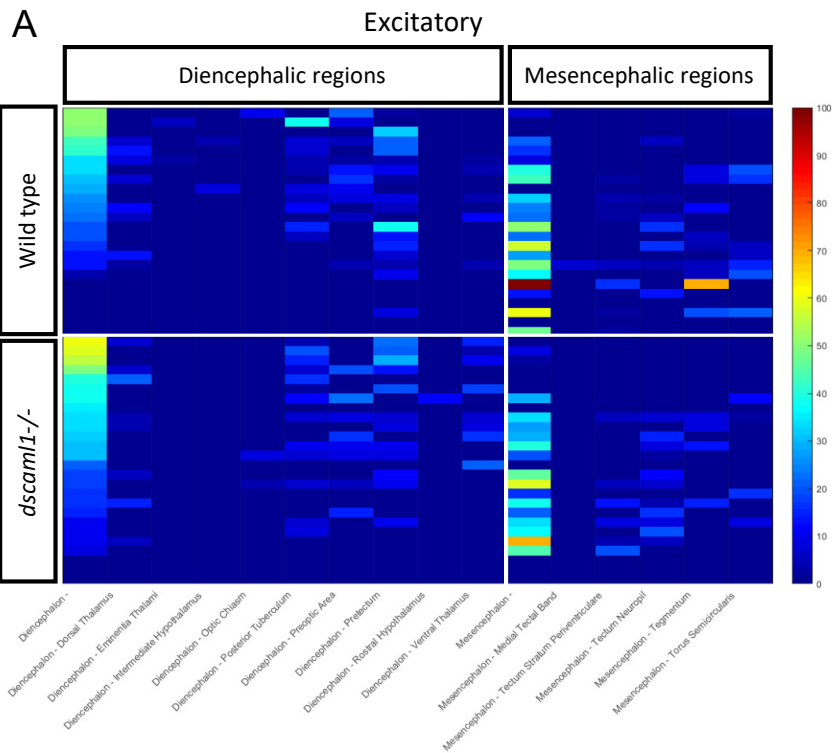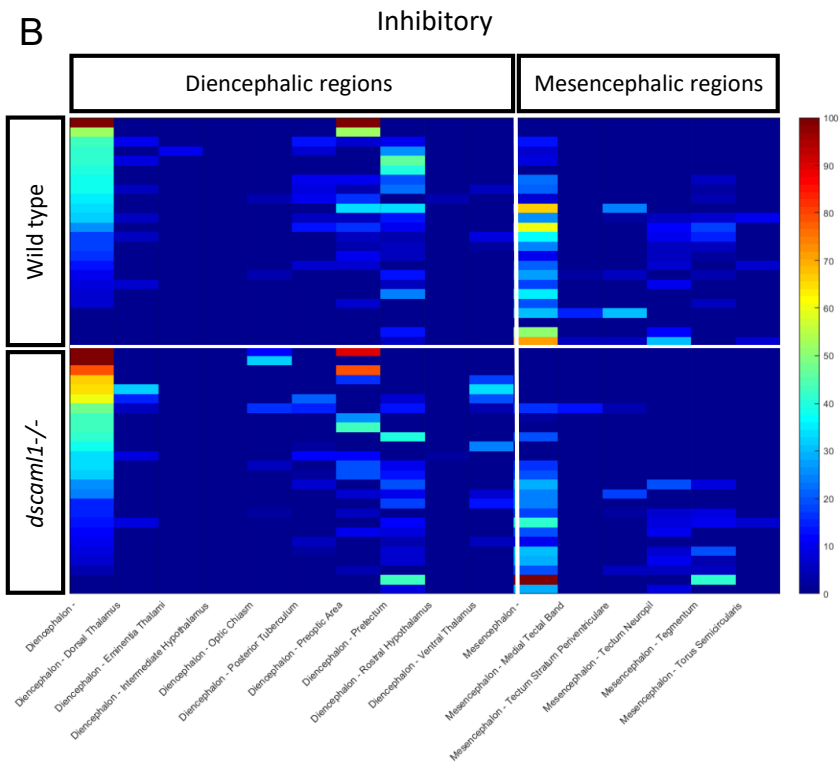

Supplementary Figure S4
